# Supplementary material for: The Gene Rearrangement, Loss, Transfer, and Deep Intronic Variation in Mitochondrial Genomes of Conidiobolus
Source: Front Microbiol. 2021 Nov 11;12:765733. doi: 10.3389/fmicb.2021.765733 (PMC8632527; doi:10.3389/fmicb.2021.765733)
Supplement: Supplementary file 3 [file Data_Sheet_1.xlsx]

## Sheet: TableS1 Phylogenomic analysis
Table S1. Species used in mitochondrial phylogenomic analysis
Taxa	Lengths (bp)	Accession Numbers	Phyla
Absidia glauca	63080	NC_036158	Mucoromycota
Allomyces macrogynus	57473	NC_001715	Blastocladiomycota
Blastocladiella emersonii	36503	NC_011360	Blastocladiomycota
Capillidium heterosporum	53364	NC_040967	Zoopagomycota
Chytriomyces confervae	225604	NC_042880	Chytridiomycota
Colletotrichum acutatum	30892	NC_027280	Ascomycota
Conidioblous chlamydosporus	29253	MZ_436168	Zoopagomycota
Conidioblous lichenicolus	42713	MZ_436169	Zoopagomycota
Conidioblous mycophagus	32218	MZ_436170	Zoopagomycota
Conidioblous polyspermus	32900	MZ_436171	Zoopagomycota
Conidioblous polytocus	43599	MZ_436172	Zoopagomycota
Conidiobolus sp.	26612	MN_640580	Zoopagomycota
Conidioblou taihushanensis	48417	MZ_436173	Zoopagomycota
Drosophila melanogaster	19524	NC_024511	Arthropoda
Ganoderma leucocontextum	88194	NC_037937	Basidiomycota
Gigaspora margarita	96998	NC_016684	Mucoromycota
Gigaspora rosea	97350	NC_016985	Mucoromycota
Glomus cerebriforme	59633	NC_022144	Mucoromycota
Harpochytrium sp. JEL105	24169	NC_004623	Chytridiomycota
Harpochytrium sp. JEL94	19473	NC_004760	Chytridiomycota
Hirsutella minnesotensis	52245	NC_027660	Ascomycota
Hyaloraphidium curvatum	29593	NC_003048	Chytridiomycota
Lactifluus hygrophoroides	48541	NC_038206	Basidiomycota
Lichtheimia hongkongensis	31830	NC_024200	Mucoromycota
Mielichhoferia elongata	100342	NC_036945	Bryophyta
Microconidiobolus nodosus	31638	MW_795365	Zoopagomycota
Monoblepharella sp. JEL15	60432	NC_004624	Chytridiomycota
Monosiga brevicollis	76568	NC_004309	Eukaryota
Neoconidiobolus thromboides	34984	MW_795364	Zoopagomycota
Neurospora crassa	64840	NC_026614	Ascomycota
Parasitella parasitica	83361	NC_024944	Mucoromycota
Pestalotiopsis fici	69529	NC_031828	Ascomycota
Phycomyces blakesleeanus	62082	NC_027730	Mucoromycota
Pleurotus eryngii	72650	NC_033533	Basidiomycota
Podila verticillata	58745	NC_006838	Mucoromycota
Rhizophagus fasciculatus	72251	NC_029185	Mucoromycota
Rhizophagus intraradices	70606	NC_012056	Mucoromycota
Rhizophagus irregularis	70800	NC_014489	Mucoromycota
Rhizophydium sp. 136	68834	NC_003053	Chytridiomycota
Rhizopus oryzae	54178	NC_006836	Mucoromycota
Spizellomyces palustris	126474	NC_042879	Chytridiomycota
Synchytrium endobioticum	72775	NC_042370	Chytridiomycota
Synchytrium microbalum	23811	NC_042878	Chytridiomycota
Tremella fuciformis	35058	NC_036422	Basidiomycota
Ustilago maydis	56814	NC_008368	Basidiomycota
Yarrowia lipolytica	47916	NC_002659	Ascomycota
Zancudomyces culisetae	58654	NC_006837	Zoopagomycota
Note: Rozella allomycis was not used in the phylogenetic reconstruction due to its limited number of PCGs.

## Sheet: TableS2 IntergenicORFs
Table S2. Intergenic ORFs in six Conidiobolus s.s. mitogenomes
	C. chlamydosporus	C. lichenicolus	C. mycophagus	C. polyspermus	C. polytocus	C. taihushanensis
orf111		Yes
orf119		Yes
orf122						Yes
orf126						Yes
orf171					Yes
orf175			Yes
orf198		Yes
orf199			Yes
orf208		Yes
orf210				Yes
orf213						Yes
orf223		Yes
orf235						Yes
orf250			Yes
orf262			Yes
orf263		Yes
orf276				Yes
orf296						Yes
orf300				Yes
orf320					Yes
orf324		Yes	Yes	Yes		Yes
orf372		Yes
orf442					Yes
orf446		Yes	Yes	Yes		Yes
orf454	Yes
orf883						Yes

## Sheet: TableS3 tRNAs
Table S3. tRNA genes in six Conidiobolus s.s. mitogenomes
	C. chlamydosporus	C. lichenicolus	C. mycophagus	C. polyspermus	C. polytocus	C. taihushanensis
trnA (tgc)	Yes	Yes	Yes	Yes	Yes	Yes
trnC (gca)	Yes	Yes	Yes	Yes	Yes	Yes
trnD (gtc)	Yes	Yes	Yes	Yes	Yes	Yes
trnE (ttc)	Yes	Yes	Yes	Yes	Yes	Yes
trnF (gaa)	Yes	Yes	Yes	Yes	Yes	Yes
trnG (tcc)	Yes	Yes	Yes	Yes	Yes	Yes
trnH (gtg)	Yes	Yes	Yes	Yes	Yes	Yes
trnI (gat)	Yes	Yes	Yes	Yes	Yes	Yes
trnK (ttt)	Yes	Yes	Yes	Yes	Yes	Yes
trnL (taa)	Yes	Yes	Yes	Yes	Yes	Yes
trnL (tag)	Yes	Yes	Yes	Yes	Yes	Yes
trnM (cat)	Yes*	Yes*	Yes*	Yes*	Yes*	Yes*
trnN (gtt)	Yes	Yes	Yes	Yes	Yes	Yes
trnP (tgg)	Yes	Yes	Yes	Yes	Yes	Yes
trnQ (ttg)	Yes	Yes	Yes	Yes	Yes	Yes
trnR (tcg)	Yes
trnR (tct)	Yes	Yes	Yes	Yes	Yes	Yes
trnS (gct)	Yes	Yes	Yes	Yes	Yes	Yes
trnS (tga)	Yes	Yes	Yes	Yes	Yes	Yes
trnT (tgt)	Yes	Yes	Yes	Yes	Yes	Yes*
trnV (tac)	Yes	Yes	Yes	Yes	Yes	Yes
trnW (tca)	Yes	Yes	Yes	Yes	Yes	Yes
trnY (gta)	Yes	Yes	Yes	Yes	Yes	Yes
Note: * two copies

## Sheet: TableS4 Intron and IntronicORFs
Table S4. Features of Intron and Intronic ORFs in six Conidiobolus s.s. mitogenomes
	Introns			Intronic ORFs																																	Conidioblous polytocus
	Names	Length (bp)	Type	Names	Length (bp)	Start codon	Stop codon	Encoded protein																													Intron/intronic ORF	Intron length	Intron type	Intronic ORF length	Start codon	Stop codon	Encoded protein
Conidioblous chlamydosporus	Cch.cobP78	294	GroupIB (5' partial)	Orf145	438	AAA	TAA	LAGLIDADG																													Cpolyt.cobP270	1036	GroupID
	Cch.cox1P2011	1031	GroupIB	Orf233	702	AGA	TAA	LAGLIDADG																													Cpolyt.cobP1342	1126	GroupID
	Cch.cox1P3172	820	GroupI (derived)	Orf291	876	ACT	TAA	LAGLIDADG
	Cch.cox1P4069	938	GroupI (derived)	Orf318	957	AAA	TAA	GIY-YIG																													Cpolyt.cobP2529	1188	GroupIA
	Cch.cox1P5205	1243	GroupIA	Orf333	1002	AAA	TAA	LAGLIDADG
	Cch.cox1P615	1111	GroupIB																																		Cpolyt.cobP3827	227	GroupIB
	Cch.nad1P615	230	GroupIB (3' partial)																																		Cpolyt.cobP4123	182	Unknown
	Cch.nad5P1950	222	GroupI (derived)
	Cch.nad5P717	1016	GroupIB																																		Cpolyt.cobP4392	1000	GroupIB
Conidioblous lichenicolus	Cli.cobP1390	1105	GroupID	Orf102	309	ATG	TAA	NA
	Cli.cobP2557	1185	GroupIA	Orf247	744	AAA	TAG	LAGLIDADG
	Cli.cobP270	1084	GroupID	Orf258	777	AGT	TAG	GIY-YIG
	Cli.cobP3852	943	GroupIB	Orf266	801	TTA	TAA	GIY-YIG
	Cli.cox1P1709	1161	GroupIB	Orf292	879	AGT	TAA	LAGLIDADG
	Cli.cox1P2964	1339	GroupID	Orf295	888	AAT	TAA	LAGLIDADG
	Cli.cox1P386	1094	GroupIB	Orf298	897	TTG	TAG	LAGLIDADG
	Cli.cox1P4314	1022	GroupIB	Orf327	984	CAA	TAG	LAGLIDADG
	Cli.cox1P5423	1111	GroupIB	Orf331	996	ACC	TAA	LAGLIDADG
	Cli.cox1P6627	1038	GroupIB	Orf332	999	CAA	TAA	LAGLIDADG
	Cli.cox1P8027	1033	GroupIB	Orf339	1020	GAA	TAA	LAGLIDADG
	Cli.cox1P9123	375	GroupIA	Orf346	1041	CAA	TAA	LAGLIDADG
	Cli.nad4P894	1023	GroupIB	Orf350	1053	AAA	TAA	LAGLIDADG
	Cli.nad5P717	957	GroupIB
Conidioblous mycophagus	Cmy.cobP306	1094	GroupIB	Orf221	636	AAA	TAA	GIY-YIG
	Cmy.cox1P2283	1038	GroupIB	Orf243	732	AAA	TAG	LAGLIDADG
	Cmy.cox1P3726	1342	GroupIA	Orf290	873	AGT	TAA	LAGLIDADG
	Cmy.cox1P709	1383	GroupID	Orf298	897	TTG	TAG	LAGLIDADG
	Cmy.nad4P894	1023	GroupIB	Orf327	984	CAA	TAG	LAGLIDADG
	Cmy.nad5P717	957	GroupIB	Orf331	996	ACC	TAA	LAGLIDADG
Conidioblous polyspermus	Cpolys.cox1P1732	1110	GroupIB	Orf217	654	ATG	TAA	LAGLIDADG
	Cpolys.cox1P2947	971	GroupIB	Orf229	690	AAA	TAA	GIY-YIG
	Cpolys.cox1P372	1117	GroupIB	Orf291	876	ACA	TAA	LAGLIDADG
	Cpolys.cox1P4098	951	GroupIB	Orf308	927	AAA	TAA	LAGLIDADG
	Cpolys.cox1P5179	786	GroupI (derived)	Orf315	948	CAA	TAA	LAGLIDADG
	Cpolys.cox1P6240	1294	GroupIA	Orf333	1002	AAA	TAA	LAGLIDADG
	Cpolys.nad5P717	957	GroupIB
Conidioblous polytocus	Cpolyt.cobP1342	1126	GroupID	Orf165	498	ATG	TAA	LAGLIDADG
	Cpolyt.cobP2529	1188	GroupIA	Orf239	720	AGT	TAA	GIY-YIG
	Cpolyt.cobP270	1036	GroupID	Orf245	738	AAA	TAG	NA
	Cpolyt.cobP3827	227	GroupIB	Orf255	768	GGA	TAA	LAGLIDADG
	Cpolyt.cobP4392	1000	GroupIB	Orf256	771	TTC	TAA	NA
	Cpolyt.cobP5456	696	GroupIB	Orf262	789	ATG	TAA	NA
	Cpolyt.cobU4123	182	Unknown	Orf272	819	ACA	TAG	LAGLIDADG
	Cpolyt.cox1P10319	1015	GroupI (derived)	Orf290	873	AGT	TAA	LAGLIDADG
	Cpolyt.cox1P11533	368	GroupIA	Orf295	888	AAT	TAA	LAGLIDADG
	Cpolyt.cox1P1818	1095	GroupIB	Orf312	939	CAA	TAA	LAGLIDADG
	Cpolyt.cox1P3007	1335	GroupID	Orf323	972	CAA	TAA	LAGLIDADG
	Cpolyt.cox1P386	1203	GroupIB (5' partial)	Orf326	981	AGA	TAA	LAGLIDADG
	Cpolyt.cox1P4353	968	GroupIB	Orf328	987	AAA	TAA	LAGLIDADG
	Cpolyt.cox1P5408	1041	GroupIB	Orf329	990	CAA	TAG	LAGLIDADG
	Cpolyt.cox1P6542	898	GroupIB	Orf334	1005	CAA	TAG	LAGLIDADG
	Cpolyt.cox1P7568	2672	GroupIB (3' partial)	Orf386	1161	AAA	TAG	LAGLIDADG
	Cpolyt.cox2P267	339	GroupIB
	Cpolyt.cox2P735	1050	GroupID
	Cpolyt.nad1P766	146	GroupI (derived)
	Cpolyt.nad1U145	151	Unknown
	Cpolyt.nad4P894	835	GroupI (derived)
	Cpolyt.nad5P1823	164	GroupI (derived)
	Cpolyt.nad5P2204	149	GroupI (derived)
	Cpolyt.nad5P2451	1094	GroupIB
	Cpolyt.nad5U684	1106	Unknown
Conidioblous taihushanensis	Cta.atp6P350	302	GroupIB	Orf100	303	ATG	TAA	NA
	Cta.cobP1289	1102	GroupID	Orf121	366	ATG	TAA	NA
	Cta.cobP2452	1170	GroupIA	Orf156	471	ATG	TAG	GIY-YIG
	Cta.cobP270	983	GroupID	Orf176	531	AAA	TAA	GIY-YIG
	Cta.cobP3733	164	GroupIB	Orf209	630	AAA	TAA	LAGLIDADG
	Cta.cobP4053	946	GroupIB	Orf217	654	ATG	TAA	NA
	Cta.cobP5063	287	GroupIB	Orf236	711	AGT	TAG	GIY-YIG
	Cta.cox1aP1699	1095	GroupIB	Orf246	741	AAA	TAG	NA
	Cta.cox1aP2888	476	GroupID	Orf261	786	GGA	TAG	LAGLIDADG
	Cta.cox1aP3375	953	GroupIB	Orf289	870	ACA	TAG	LAGLIDADG
	Cta.cox1aP4339	627	GroupIB	orf290	873	AAT	TAA	LAGLIDADG
	Cta.cox1aP461	1084	GroupIB	Orf309	930	CAA	TAA	LAGLIDADG
	Cta.cox1aP5042	1047	GroupIB	orf311	936	CAA	TAG	LAGLIDADG
	Cta.cox1aP6182	921	GroupIB	Orf314	945	AAT	TAG	LAGLIDADG
	Cta.cox1bP12782	1042	GroupI (derived)	Orf327	984	CAA	TAG	LAGLIDADG
	Cta.cox1bP14022	902	GroupIA (5' partial)	Orf328	987	AAA	TAA	LAGLIDADG
	Cta.cox1bU7232	5499	Unknown	Orf336	1011	CAA	TAG	LAGLIDADG
	Cta.cox2P357	1097	GroupID	Orf364	1095	AAA	TAA	LAGLIDADG
	Cta.nad1P1373	149	GroupI (derived)
	Cta.nad1P175	728	GroupIB
	Cta.nad4P2100	1023	GroupIB
	Cta.nad4P714	1286	GroupIB
	Cta.nad5P1385	871	GroupI (derived)
	Cta.nad5P2482	991	GroupIB (3' partial)
	Cta.nad5P417	668	GroupI (derived)

## Sheet: TableS5 Codon usage
Table S5. Start and stop codon analyses of 14 core protein-coding genes in ten Conidiobolus s.l. mitogenomes
Species	atp6		atp8		atp9		cob		cox1		cox2		cox3		nad1		nad2		nad3		nad4		nad4L		nad5		nad6
	start	stop	start	stop	start	stop	start	stop	start	stop	start	stop	start	stop	start	stop	start	stop	start	stop	start	stop	start	stop	start	stop	start	stop
Conidioblous chlamydosporus	ATG	TAA	NA	NA	ATG	TAA	ATG	TAA	ATG	TAA	ATG	TAA	ATG	TAA	ATG	TAG	ATG	TAA	ATG	TAA	ATG	TAA	ATG	TAA	ATG	TAA	ATG	TAG
Conidioblous lichenicolus	ATG	TAA	ATG	TAA	ATG	TAA	ATG	TAA	ATG	TAA	GTG	TAA	ATG	TAA	ATG	TAG	ATG	TAG	ATG	TAA	ATG	TAA	ATG	TAG	ATG	TAA	ATG	TAA
Conidioblous mycophagus	ATG	TAA	ATG	TAA	ATG	TAA	ATG	TAA	ATG	TAA	GTG	TAA	ATG	TAA	ATG	TAG	ATG	TAG	ATG	TAA	ATG	TAA	ATG	TAG	ATG	TAA	TTG	TAG
Conidioblous polyspermus	GTG	TAA	NA	NA	ATG	TAA	ATG	TAA	ATG	TAA	ATG	TAG	ATG	TAA	ATG	TAG	TTG	TAG	ATG	TAA	ATG	TAA	ATG	TAG	ATG	TAG	ATG	TAG
Conidioblous polytocus	ATG	TAA	NA	NA	ATG	TAA	ATG	TAA	ATG	TAA	GTG	TAA	ATG	TAA	ATG	TAG	ATG	TAG	ATG	TAA	ATG	TAA	ATG	TAG	ATG	AAA	ATG	TAA
Conidioblou taihushanensis	ATG	TAA	ATG	TAA	ATG	TAA	ATG	TAA	ATG	TAA	ATG	TAA	ATG	TAA	ATG	TAA	ATG	TAA	ATG	TAA	ATG	TAA	ATG	TAG	ATG	TAA	ATG	TAA
Capillidium heterosporum	ATG	TAA	ATG	TAA	GTG	TAA	ATT	TAA	GTG	TAA	ATG	TAA	ATG	TAG	ATG	TAA	ATG	TAA	ATG	TAG	ATG	TAG	ATG	TAG	ATG	TAA	ATG	TAA
Conidiobolus sp.	ATG	TAA	ATG	TAA	ATG	TAA	ATG	TAA	ATG	TAA	ATG	TAG	ATG	TAA	ATG	TAG	ATG	TAG	ATG	TAA	ATG	TAA	ATG	TAG	ATG	TAA	ATG	TAA
Microconidiobolus nodosus	ATG	TAA	ATG	TAA	ATG	TAA	ATG	TAA	ATG	TAA	ATG	TAA	ATG	TAA	ATG	TAA	TTG	TAA	ATG	TAG	ATG	TAA	ATG	TAA	ATG	TAA	ATG	TAA
Neoconidiobolus thromboides	ATG	TAA	ATG	TAA	ATG	TAA	ATG	TAA	ATG	TAA	ATG	TAA	ATG	TAA	ATG	TAA	ATG	TAA	ATG	TAG	ATG	TAG	ATG	TAA	ATG	TAA	ATG	TAA
Note: NA, not available

## Sheet: TableS6 Mitogenomes Blast
Table S6. Local BLAST analysis of ten Conidiobolus s.l. mitogenomes
Species	Identitie (%)	Aligned length (bp)	Mismatched bases (bp)	Gaps (bp)	from	to	from	to	evalue
C. chlamydosporus	97.78	45	1	0	25213	25257	25136	25180	2e-16
C. lichenicolus	83.28	293	49	0	6897	7189	5752	6044	2e-49
C. lichenicolus	96.43	56	2	0	37098	37153	35965	36020	3e-20
C. lichenicolus	96.43	56	2	0	35965	36020	37098	37153	3e-20
C. lichenicolus	93.44	61	4	0	5857	5917	7002	7062	2e-18
C. lichenicolus	87.95	83	10	0	20788	20870	5761	5843	3e-17
C. lichenicolus	80.42	189	37	0	6918	7106	20800	20988	4e-16
C. lichenicolus	94.23	52	3	0	20707	20758	5683	5734	2e-15
C. lichenicolus	87.5	80	10	0	20800	20879	6918	6997	2e-15
C. lichenicolus	94.23	52	3	0	5683	5734	20707	20758	2e-15
C. lichenicolus	91.38	58	5	0	37097	37154	5179	5236	3e-14
C. lichenicolus	91.38	58	5	0	5179	5236	37097	37154	3e-14
C. lichenicolus	97.5	40	1	0	7970	8009	2953	2992	4e-13
C. lichenicolus	97.5	40	1	0	2953	2992	7970	8009	4e-13
C. mycophagus	100	44	0	0	3466	3509	2832	2875	4e-18
C. mycophagus	100	43	0	0	2832	2874	3466	3508	2e-17
C. mycophagus	92.98	57	4	0	29968	30024	23532	23588	3e-16
C. mycophagus	92.98	57	4	0	23532	23588	29968	30024	3e-16
C. polyspermus	96	150	5	1	13604	13753	12824	12972	1e-64
C. polyspermus	95.74	141	6	0	30917	31057	25802	25942	1e-61
C. polyspermus	95.74	141	6	0	25802	25942	30917	31057	1e-61
C. polyspermus	95.65	115	4	1	12859	12972	13639	13753	4e-46
C. polyspermus	95.56	90	4	0	30545	30634	1321	1410	5e-36
C. polyspermus	95.56	90	4	0	1321	1410	30545	30634	5e-36
C. polyspermus	96.2	79	3	0	23756	23834	12937	13015	8e-32
C. polyspermus	93.26	89	6	0	30937	31025	25770	25858	1e-30
C. polyspermus	93.26	89	6	0	25770	25858	30937	31025	1e-30
C. polyspermus	96	75	3	0	23754	23828	13716	13790	2e-29
C. polyspermus	100	37	0	0	30916	30952	1352	1388	6e-14
C. polyspermus	100	37	0	0	1352	1388	30916	30952	6e-14
C. polyspermus	100	36	0	0	25802	25837	1353	1388	3e-13
C. polyspermus	100	36	0	0	25854	25889	1353	1388	3e-13
C. polyspermus	100	36	0	0	5831	5866	4545	4580	3e-13
C. polyspermus	100	36	0	0	4545	4580	5831	5866	3e-13
C. polyspermus	100	36	0	0	1353	1388	25802	25837	3e-13
C. polyspermus	100	36	0	0	1353	1388	25854	25889	3e-13
C. polyspermus	100	35	0	0	30967	31001	1351	1385	1e-12
C. polyspermus	90.91	55	5	0	5827	5881	18812	18866	1e-12
C. polyspermus	95.35	43	2	0	30577	30619	25802	25844	1e-12
C. polyspermus	95.35	43	2	0	30577	30619	25854	25896	1e-12
C. polyspermus	95.35	43	2	0	25802	25844	30577	30619	1e-12
C. polyspermus	95.35	43	2	0	25854	25896	30577	30619	1e-12
C. polyspermus	100	35	0	0	1351	1385	30967	31001	1e-12
C. polyspermus	90.74	54	5	0	5468	5521	4179	4232	4e-12
C. polyspermus	90.74	54	5	0	4179	4232	5468	5521	4e-12
C. polyspermus	97.37	38	1	0	13716	13753	23754	23791	4e-12
C. polyspermus	85.53	76	11	0	4407	4482	5696	5771	6e-11
C. polyspermus	97.22	36	1	0	12937	12972	23756	23791	6e-11
C. polytocus	85	240	36	0	28642	28881	27524	27763	2e-36
C. polytocus	86.07	122	17	0	25483	25604	2315	2436	8e-24
C. polytocus	100	51	0	0	16982	17032	16703	16753	5e-22
C. polytocus	100	51	0	0	16703	16753	16982	17032	5e-22
C. polytocus	96.43	56	2	0	15063	15118	13953	14008	3e-20
C. polytocus	96.43	56	2	0	13953	14008	15063	15118	3e-20
C. polytocus	91.8	61	5	0	27690	27750	28808	28868	5e-16
C. polytocus	92.86	56	4	0	27071	27126	15063	15118	2e-15
C. polytocus	92.86	56	4	0	15063	15118	27071	27126	2e-15
C. polytocus	85.56	90	13	0	2318	2407	25486	25575	3e-14
C. polytocus	97.5	40	1	0	24780	24819	1609	1648	4e-13
C. polytocus	97.5	40	1	0	1609	1648	24780	24819	4e-13
C. polytocus	89.47	57	6	0	27071	27127	13953	14009	3e-11
C. polytocus	89.47	57	6	0	13953	14009	27071	27127	3e-11
C. taihushanensis	97.4	154	4	0	38510	38663	24596	24749	3e-61
C. taihushanensis	97.4	154	4	0	24596	24749	38510	38663	4e-60
C. taihushanensis	86.26	211	27	2	12239	12448	10494	10703	2e-43
C. taihushanensis	85.64	202	24	4	29537	29737	10425	10622	7e-34
C. taihushanensis	85.54	166	24	0	10494	10659	12239	12404	3e-33
C. taihushanensis	82.78	180	31	0	12269	12448	29639	29818	6e-25
C. taihushanensis	83.54	158	26	0	29639	29796	12269	12426	1e-23
C. taihushanensis	85.64	202	24	4	10425	10622	29537	29737	1e-23
C. taihushanensis	92.98	57	4	0	47830	47886	9990	10046	6e-16
C. taihushanensis	92.98	57	4	0	9990	10046	47830	47886	6e-16
C. taihushanensis	92.86	56	4	0	47831	47886	46714	46769	2e-15
C. taihushanensis	92.86	56	4	0	46714	46769	47831	47886	2e-15
C. taihushanensis	89.47	57	6	0	46714	46770	9991	10047	3e-11
C. taihushanensis	89.47	57	6	0	9991	10047	46714	46770	3e-11
Conidiobolus sp.	90	70	7	0	2365	2434	2588	2657	4e-17
Neoconidiobolus thromboides	89.53	172	18	0	3534	3705	30352	30523	2e-51
Neoconidiobolus thromboides	98.13	107	2	0	9661	9767	17123	17229	7e-51
Neoconidiobolus thromboides	98.8	83	1	0	17147	17229	9685	9767	6e-39
Neoconidiobolus thromboides	90.16	122	12	0	30352	30473	3534	3655	6e-36
Neoconidiobolus thromboides	95.12	82	4	0	14454	14535	24961	25042	4e-31
Neoconidiobolus thromboides	98.48	66	1	0	8792	8857	17123	17188	9e-29
Neoconidiobolus thromboides	98.44	64	1	0	24961	25024	14454	14517	1e-27
Neoconidiobolus thromboides	91.78	73	6	0	4610	4682	10649	10721	5e-21
Neoconidiobolus thromboides	100	42	0	0	17147	17188	8816	8857	8e-17
Neoconidiobolus thromboides	90.16	61	6	0	10649	10709	4610	4670	7e-14
Neoconidiobolus thromboides	90.74	54	5	0	7004	7057	5792	5845	4e-12
Neoconidiobolus thromboides	90.74	54	5	0	5792	5845	7004	7057	4e-12
Microconidiobolus nodosus	97.78	45	1	0	31385	31429	15046	15090	2e-16
Microconidiobolus nodosus	97.78	45	1	0	15046	15090	31385	31429	2e-16
Microconidiobolus nodosus	100	32	0	0	22149	22180	23094	23125	6e-11
Capillidium heterosporum	100	59	0	0	29361	29419	12836	12894	1e-26
Capillidium heterosporum	92.5	80	6	0	11671	11750	32368	32447	8e-25
Capillidium heterosporum	92.31	78	6	0	32370	32447	11673	11750	1e-23
Capillidium heterosporum	89.47	95	7	1	39463	39557	22976	23067	5e-23
Capillidium heterosporum	89.47	95	7	1	22976	23067	39463	39557	5e-23
Capillidium heterosporum	98.18	55	1	0	29361	29415	29650	29704	7e-22
Capillidium heterosporum	96.39	83	3	0	23244	23326	21016	21098	3e-21
Capillidium heterosporum	96.39	83	3	0	21016	21098	23244	23326	3e-21
Capillidium heterosporum	94.92	59	3	0	30732	30790	5543	5601	2e-19
Capillidium heterosporum	94.92	59	3	0	5543	5601	30732	30790	2e-19
Capillidium heterosporum	80	210	42	0	23307	23516	39731	39940	2e-16
Capillidium heterosporum	91.53	59	5	0	5975	6033	4921	4979	1e-14
Capillidium heterosporum	91.53	59	5	0	4921	4979	5975	6033	1e-14
Capillidium heterosporum	88.73	71	8	0	39731	39801	23307	23377	1e-14
Capillidium heterosporum	91.07	56	5	0	31189	31244	5976	6031	7e-13
Capillidium heterosporum	91.07	56	5	0	5976	6031	31189	31244	7e-13
Capillidium heterosporum	88.71	62	7	0	41555	41616	34405	34466	1e-11
Capillidium heterosporum	88.71	62	7	0	34405	34466	41555	41616	1e-11

## Sheet: TableS7 Tandem repeats 
Table S7. Tandem repeats found in ten Conidiobolus s.l. mitogenomes
Species	Indices	Period size	Copy number	Consensus size	Percent matches	Percent indels	Score	A	C	G	T	Entropy (0-2)	Repeat motif
C. chlamydosporus	165--194	12	2.5	12	94	0	51	63	16	3	16	1.44	CAATAATAACAA
C. chlamydosporus	1248--1294	17	2.8	17	86	0	67	65	0	21	12	1.25	AAAGAGAAAATAGAATA
C. chlamydosporus	1881--1972	45	2.1	42	79	15	98	67	0	13	19	1.23	AAGAAGAAGAAGAATGAATAAAATAATATAAAAATAATAAAA
C. chlamydosporus	1878--2077	105	1.9	105	79	15	227	67	0	14	18	1.26	TAGAAGAAGTAAAAGAATTATATAAAAAATATAAAGAGATAATAAAAATAGAAGAAAAAGAATAAATAAAATTATATGAAAAAAAGAAAAAAGAATGAATAAATA
C. chlamydosporus	2037--2153	54	2.1	55	80	9	132	80	1	10	7	0.98	AAAAAAGAATAATAAAAAACAAAAAAAAAGAAAAAAAATAAATACAAGAAAAAAG
C. chlamydosporus	2035--2152	12	10.4	11	72	8	69	81	1	9	7	0.94	AAAAAAAAGAA
C. chlamydosporus	2035--2152	25	4.6	24	75	14	87	81	1	9	7	0.94	AAAAAAAAGAAAAAAAAAAATACA
C. chlamydosporus	2332--2382	21	2.4	21	83	3	57	60	3	15	19	1.5	AGAAGTAAAAAGAACAATAAT
C. chlamydosporus	2429--2468	21	2	20	85	5	53	75	0	7	17	1.03	AAAAAAATAAGAAAAATATA
C. chlamydosporus	6212--6259	3	14.7	3	83	16	60	60	0	0	39	0.97	ATA
C. chlamydosporus	6212--6260	10	4.9	10	100	0	98	59	0	0	40	0.98	ATAATAATTA
C. chlamydosporus	7620--7655	18	2.1	17	89	5	54	47	0	13	38	1.44	AATATAATAATGGGATT
C. chlamydosporus	7714--7740	10	2.7	10	100	0	54	77	0	0	22	0.76	TAAATAAAAA
C. chlamydosporus	8174--8256	27	3.1	27	91	0	139	57	7	15	19	1.61	AAAGCTAATAAAGCTATAATGATGAAA
C. chlamydosporus	9163--9191	10	2.9	10	100	0	58	72	0	27	0	0.85	AAGAGAAAAG
C. chlamydosporus	10938--11003	21	3.3	20	83	8	82	77	0	19	3	0.9	AAAAAAGAAAAGGAAAGAAA
C. chlamydosporus	10937--11002	7	9.6	7	71	15	57	77	0	19	3	0.9	GAAAAAA
C. chlamydosporus	10951--10998	15	3.1	15	80	11	53	79	0	16	4	0.89	AAAGTAAAAAAGAAA
C. chlamydosporus	11530--11559	7	4.3	7	95	0	51	86	3	10	0	0.67	AAAAGAA
C. chlamydosporus	12246--12319	3	24.7	3	78	8	71	71	0	22	5	1.06	AAG
C. chlamydosporus	12246--12321	16	4.9	16	93	3	129	71	0	22	6	1.09	AAGAAGAAAGAATAAG
C. chlamydosporus	12374--12400	11	2.5	11	100	0	54	59	0	18	22	1.38	AAAAGGATATT
C. chlamydosporus	12396--12431	6	6.3	6	87	12	58	83	0	16	0	0.65	AAAAGA
C. chlamydosporus	12396--12431	11	3.3	11	100	0	72	83	0	16	0	0.65	AAAAGAAAAAG
C. chlamydosporus	16380--16468	24	3.7	24	76	19	71	77	3	13	5	1.07	AAAAAAGAATAAGAAAAAGAAGAA
C. chlamydosporus	16387--16468	15	5.1	15	69	21	58	76	3	13	6	1.1	AAAGAAAAAAAAGAA
C. chlamydosporus	18098--18149	16	3.2	16	73	10	52	78	0	13	7	0.94	AAAAAAAAAGAAAAGA
C. chlamydosporus	18106--18165	23	2.6	23	77	12	61	73	0	20	6	1.05	AGAATAAGAAGAAAAAAAGAAAG
C. chlamydosporus	18142--18200	18	3.3	17	75	17	57	69	0	25	5	1.09	AAGAAAAAGAGAAAAAG
C. chlamydosporus	18142--18218	8	8.2	9	69	22	52	68	0	24	6	1.13	AAGAAAAAG
C. chlamydosporus	19024--19092	29	2.6	25	75	18	68	68	0	21	10	1.19	AAGAGAAAAAGAATGAAGAAAGAGA
C. chlamydosporus	19108--19138	9	3.6	9	91	8	55	77	0	22	0	0.77	AAGAAGAAA
C. chlamydosporus	19043--19159	17	6.5	17	72	21	62	71	0	19	7	1.15	AAGAAAAGAAAGAGAAA
C. chlamydosporus	19054--19156	54	1.9	55	84	15	144	72	0	19	6	1.12	AGAAAAAAAGAATGAAGAAAGAGAAAGAAAAAAGAATGATAAGAAAAAAATCATA
C. chlamydosporus	19952--19981	13	2.2	14	94	5	53	70	0	20	10	1.16	ATAAAGAAAAGAGA
C. chlamydosporus	19999--20082	33	2.5	33	92	1	132	60	0	10	28	1.3	AAAAGATATTAAAATTAATATAAAAGGAATATG
C. chlamydosporus	19963--20102	33	4.3	33	76	13	96	64	0	12	22	1.28	GAATAAGAAAAGATATTAAAATTAAAATAAATA
C. chlamydosporus	20258--20287	9	3.4	9	95	4	53	83	0	16	0	0.65	AAAAAGAGA
C. chlamydosporus	20245--20289	17	2.7	16	89	6	63	75	0	22	2	0.91	AAGAAAAAAGAGAAAA
C. chlamydosporus	22100--22127	4	7	4	100	0	56	75	0	0	25	0.81	AATA
C. chlamydosporus	22168--22215	11	4.2	12	86	7	73	83	0	14	2	0.74	AAAAGAAAAGAA
C. chlamydosporus	22173--22261	23	3.4	26	80	14	87	77	0	19	3	0.91	AAAAGAAAAAAGAAAGAAAAGGAGAA
C. chlamydosporus	22168--22215	23	2.1	23	96	0	87	83	0	14	2	0.74	AAAAGAAAATAAAAAAGAAAGAA
C. chlamydosporus	25099--25138	19	2.1	19	86	9	55	77	0	10	12	0.99	AAAAAGAATAAATAAAAAT
C. chlamydosporus	25119--25281	77	2.1	77	95	1	290	57	7	14	20	1.62	AAAAAATAAAAAAAAATAATATATGATAAAGAGTAACCTCAGAGACTAGATATCTGATTAGCAGAAAAAAGAAAGCT
C. chlamydosporus	25597--25638	14	3.2	14	74	19	54	78	0	11	9	0.96	AAAGAATAAAAGAA
C. chlamydosporus	25629--25681	1	53	1	76	0	52	88	7	3	0	0.61	A
C. chlamydosporus	25629--25684	7	8	7	90	7	78	87	8	3	0	0.65	AAAACAA
C. chlamydosporus	25597--25674	25	3.1	24	82	10	70	83	3	7	5	0.9	AAAGAATAAAAGAAAAAAAAAAAA
C. chlamydosporus	25597--25711	15	7.7	14	72	18	63	80	4	9	5	0.99	AAAGAAAAAAAAAA
C. chlamydosporus	25629--25692	21	3	21	80	8	76	85	7	6	0	0.73	AAAACAAAAAAAAAGAAAAAA
C. chlamydosporus	28977--29035	7	9.5	6	72	20	50	81	1	13	3	0.9	AAAAAG
C. chlamydosporus	28975--29035	15	3.7	16	76	10	61	81	1	13	3	0.88	AAAAAAAGAAAAAGAA
C. chlamydosporus	28985--29036	22	2.4	22	87	3	70	80	1	15	1	0.88	AAAAGAAAGAAAAAAGAAAAAA
C. chlamydosporus	28985--29035	11	4.7	11	78	2	59	82	1	13	1	0.85	AAAAGAAAAAA
C. lichenicolus	1018--1054	15	2.3	17	86	9	51	70	0	27	2	1.01	AAAAAAGGAAAAGTGAG
C. lichenicolus	5500--5536	18	2.1	18	94	0	65	43	5	24	27	1.76	AGCAAGGTAATATGTAAT
C. lichenicolus	18255--18372	60	2	60	80	9	134	61	0	16	22	1.35	ATTAAAGAAAGAGGAAGAAAAAGTAAGAAAATTATATAGAAAAAATAAAGAAATAATATT
C. lichenicolus	18512--18564	24	2.2	24	86	6	81	77	3	11	7	1.1	AAAAAAGAAGAAAACAAAATTGAA
C. lichenicolus	18537--18607	33	2.2	33	85	10	92	81	2	8	7	0.95	AAAAAGAAGAAAACAAAATATAAGAAAAAAAAA
C. lichenicolus	18569--18636	26	2.7	25	80	8	75	75	4	8	11	1.18	AAAAAAGAAAAAAAATAAATAACAG
C. lichenicolus	18892--18931	21	2	20	85	5	53	75	0	7	17	1.03	AAAAAAATAAGAAAAATATA
C. lichenicolus	24912--24947	18	2.1	17	89	5	54	50	0	13	36	1.43	AATATAATAATAGGATT
C. lichenicolus	27816--27872	18	3.3	18	71	20	50	75	5	19	0	0.99	GAAAAAAAGAAAGCAAAG
C. lichenicolus	27819--27856	13	2.9	14	88	7	53	78	5	15	0	0.91	AAAAAGAAAAAAGC
C. lichenicolus	29307--29335	7	4.3	7	91	8	51	86	0	13	0	0.58	AAAAGAA
C. lichenicolus	29307--29335	13	2.1	14	93	6	51	86	0	13	0	0.58	AAAAGAAAAAAGAA
C. lichenicolus	34610--34669	19	3.1	18	80	15	66	80	0	11	8	0.92	AAAAGAAAAAGAGAAAAT
C. lichenicolus	34609--34669	20	3.1	19	84	13	79	80	0	11	8	0.91	AAAAAAAAAAAGAGAAAAT
C. lichenicolus	38178--38219	17	2.4	18	80	15	52	61	0	4	33	1.17	ATAAAAATGATTAAATAT
C. lichenicolus	40220--40287	4	17.5	4	74	17	63	72	0	26	1	0.94	AAGA
C. lichenicolus	40214--40268	15	3.2	18	75	19	55	70	0	25	3	1.03	AAAAAGAAGAAAGAGAAG
C. lichenicolus	41083--41145	19	3.4	18	76	6	63	73	1	20	4	1.11	AAGAAAAGAAGAAAAAGA
C. mycophagus	6023--6140	60	2	60	80	9	134	61	0	16	22	1.35	ATTAAAGAAAGAGGAAGAAAAAGTAAGAAAATTATATAGAAAAAATAAAGAAATAATATT
C. mycophagus	6280--6332	24	2.2	24	86	6	81	77	3	11	7	1.1	AAAAAAGAAGAAAACAAAATTGAA
C. mycophagus	6305--6375	33	2.2	33	85	10	92	81	2	8	7	0.95	AAAAAGAAGAAAACAAAATATAAGAAAAAAAAA
C. mycophagus	6337--6404	26	2.7	25	80	8	75	75	4	8	11	1.18	AAAAAAGAAAAAAAATAAATAACAG
C. mycophagus	6660--6699	21	2	20	85	5	53	75	0	7	17	1.03	AAAAAAATAAGAAAAATATA
C. mycophagus	12680--12715	18	2.1	17	89	5	54	50	0	13	36	1.43	AATATAATAATAGGATT
C. mycophagus	15449--15505	18	3.3	18	71	20	50	75	5	19	0	0.99	GAAAAAAAGAAAGCAAAG
C. mycophagus	15452--15489	13	2.9	14	88	7	53	78	5	15	0	0.91	AAAAAGAAAAAAGC
C. mycophagus	16935--16963	7	4.3	7	91	8	51	86	0	13	0	0.58	AAAAGAA
C. mycophagus	16935--16963	13	2.1	14	93	6	51	86	0	13	0	0.58	AAAAGAAAAAAGAA
C. mycophagus	18023--18064	16	2.6	16	81	11	50	52	0	45	2	1.13	GGAAAAAGGAGGAAGA
C. mycophagus	22139--22199	21	3.1	18	76	19	59	80	0	11	8	0.91	AAAAGAAAAAGAGAAAAT
C. mycophagus	22138--22199	20	3.1	19	84	11	79	80	0	11	8	0.9	AAAAAAAAAAAGAGAAAAT
C. mycophagus	24526--24593	4	17.5	4	74	17	63	72	0	26	1	0.94	AAGA
C. mycophagus	24520--24574	15	3.2	18	75	19	55	70	0	25	3	1.03	AAAAAGAAGAAAGAGAAG
C. mycophagus	25389--25451	19	3.4	18	76	6	63	73	1	20	4	1.11	AAGAAAAGAAGAAAAAGA
C. mycophagus	28022--28058	15	2.3	17	86	9	51	70	0	27	2	1.01	AAAAAAGGAAAAGTGAG
C. polyspermus	3419--3453	16	2.1	18	89	10	56	77	0	11	11	1	AGAAATATAAATAAAGAA
C. polyspermus	8220--8275	24	2.4	23	80	11	60	64	1	17	16	1.38	AAAAAGAATAGGTGAAGAAATAA
C. polyspermus	8442--8481	19	2.1	19	86	9	55	77	0	10	12	0.99	AAAAAGAATAAATAAAAAT
C. polyspermus	14483--14537	24	2.3	24	75	6	58	54	0	9	36	1.32	ATTATTATTAATAGAGAAAATAAA
C. polyspermus	14636--14753	60	2	60	80	9	134	61	0	16	22	1.35	ATTAAAGAAAGAGGAAGAAAAAGTAAGAAAATTATATAGAAAAAATAAAGAAATAATATT
C. polyspermus	14893--14945	24	2.2	24	86	6	81	77	3	11	7	1.1	AAAAAAGAAGAAAACAAAATTGAA
C. polyspermus	14918--14988	33	2.2	33	85	10	92	81	2	8	7	0.95	AAAAAGAAGAAAACAAAATATAAGAAAAAAAAA
C. polyspermus	14950--15005	25	2.2	25	84	9	69	76	5	8	8	1.14	AAAAAAGAAAAAAAATAAATATAAG
C. polyspermus	20362--20397	18	2.1	17	89	5	54	50	0	13	36	1.43	AATATAATAATAGGATT
C. polyspermus	24979--25008	7	4.3	7	100	0	60	86	0	13	0	0.57	AAAAGAA
C. polyspermus	25603--25643	21	2	21	90	0	64	48	7	12	31	1.68	GTAAGATAAAATAATTTAACC
C. polyspermus	25770--25910	52	2.7	52	100	0	282	39	13	14	32	1.85	GGTGGTAAGATAAAATTATTTAATTGATAACCAATCAACCACCACTTTATGT
C. polyspermus	25914--26025	14	8	14	98	0	215	35	13	14	36	1.85	CTTACAGTAATGAT
C. polyspermus	30916--31025	52	2.1	52	93	0	184	36	17	13	32	1.89	TAATCAACCACCACTTTATGTGGTGGTAAGATAAAATTATTTAACTGATAAC
C. polyspermus	31029--31057	14	2.1	14	100	0	58	34	17	13	34	1.89	CTTACAGTAATGAT
C. polyspermus	31117--31180	21	3.1	20	84	6	83	81	0	9	9	0.88	AAAAAAAAAAAAGAGAAAAT
C. polyspermus	32474--32532	10	5.9	10	75	13	50	72	0	25	1	0.93	AAAGAAAAAG
C. polyspermus	32473--32519	18	2.7	18	77	9	53	70	0	27	2	0.99	AAAAGAAAGAAAGAGAGA
C. polyspermus	32503--32533	11	2.7	11	95	5	53	80	0	19	0	0.71	AGAAAAAAGAA
C. polytocus	3479--3514	18	2.1	17	89	5	54	50	0	13	36	1.43	AATATAATAATAGGATT
C. polytocus	6118--6180	28	2.2	27	83	10	81	63	0	28	7	1.22	AAAAAGAGAAAGAAAAGAAAGTAGGTA
C. polytocus	7828--7857	7	4.3	7	100	0	60	86	0	13	0	0.57	AAAAGAA
C. polytocus	8568--8627	16	3.7	16	80	10	68	58	0	38	3	1.15	AGGGAAAAGGAAGAAA
C. polytocus	12632--12686	22	2.5	21	82	11	58	76	0	16	7	1	AAAGAAAAAAAGAGAAAAATA
C. polytocus	12659--12688	15	1.9	15	93	6	51	80	0	10	10	0.92	AAAAAAAGAAAATAT
C. polytocus	16170--16211	17	2.4	18	80	15	52	61	2	2	33	1.21	ATAAAAATGATTAAATAT
C. polytocus	22853--22921	23	2.9	23	89	10	104	65	0	27	7	1.19	TGAGAAAAGTGAGAAAAAAAAGA
C. polytocus	22862--22909	14	3.7	14	71	21	50	64	0	27	8	1.22	TGAGAAAAAGAAGA
C. polytocus	23990--24023	16	2.1	16	88	0	50	73	2	5	17	1.16	AATATAAAAAACAATA
C. polytocus	27779--27817	21	2	20	85	10	53	58	2	2	35	1.25	ATTAAATAAAAAATGTAATC
C. polytocus	30024--30079	24	2.4	23	80	11	60	64	1	17	16	1.38	AAAAAGAATAGGTGAAGAAATAA
C. polytocus	38935--38989	24	2.3	24	75	6	58	54	0	9	36	1.32	ATTATTATTAATAGAGAAAATAAA
C. polytocus	39076--39193	60	2	60	81	9	143	61	0	16	22	1.35	ATTAAAGAAAGAGGAAGAAAAAGTAAGAAAATTATATAGAAAAAATAAAGAAATAATATT
C. polytocus	39278--39428	34	4.4	32	72	17	117	78	2	12	5	1.03	AAAAAAGAAAAAAAAGAAAGAAAAAAATAGAA
C. polytocus	39278--39428	12	13.4	11	71	20	75	78	2	12	5	1.03	AAAAATAGAAA
C. polytocus	39278--39346	19	3.5	20	76	5	70	79	0	14	5	0.9	AAAAAAGAAAATAAGAGAAA
C. polytocus	39278--39428	11	14.4	10	69	16	92	78	2	12	5	1.03	AAAAAAGAAA
C. polytocus	39279--39428	15	9.9	14	69	12	66	78	2	12	6	1.03	AAAAAAAAAAAAAG
C. polytocus	39279--39425	79	1.9	79	83	8	192	78	2	12	6	1.05	AAAAAGAAGAAAAAAAAATAGAAAAAAACAAAAAAAAAGAAAGAAAATAAAGACAAGAAAAAAGAAAACAAAATTGAAG
C. taihushanensis	161--189	15	2	15	93	6	51	62	13	0	24	1.32	AAAATATTACCAAAT
C. taihushanensis	478--520	17	2.4	18	81	14	54	60	2	2	34	1.22	TATAAAAATGATTAAATA
C. taihushanensis	2994--3039	16	2.8	17	81	18	53	71	0	26	2	0.97	AAAAAGAGAAAGATGAG
C. taihushanensis	3025--3055	11	2.7	11	95	5	53	80	0	19	0	0.71	AGAAAAAAGAA
C. taihushanensis	13608--13663	24	2.4	23	80	11	60	64	1	17	16	1.38	AAAAAGAATAGGTGAAGAAATAA
C. taihushanensis	13818--13857	19	2.1	19	86	9	55	77	0	10	12	0.99	AAAAAGAATAAATAAAAAT
C. taihushanensis	20022--20071	13	3.9	13	80	10	59	68	2	2	28	1.12	ATAATAAATAATA
C. taihushanensis	25770--25824	21	2.5	21	73	8	56	56	0	10	32	1.34	ATTATTAATAGAGAATATAAA
C. taihushanensis	25920--26037	60	2	60	80	9	134	61	0	16	22	1.35	ATTAAAGAAAGAGGAAGAAAAAGTAAGAAAATTATATAGAAAAAATAAAGAAATAATATT
C. taihushanensis	26179--26229	24	2.1	24	89	7	77	76	3	11	7	1.13	AAAAGAAGAAAACAAAATTGAAAA
C. taihushanensis	26202--26272	33	2.1	34	87	10	101	81	2	8	7	0.95	AAAAAGAAGAAAACAAAATATAAGAAAAACAAAA
C. taihushanensis	26432--26491	21	3	21	73	16	63	70	0	13	16	1.18	AAGAATAATAAAAGTAAAAAT
C. taihushanensis	35311--35346	18	2.1	17	89	5	54	50	0	13	36	1.43	AATATAATAATAGGATT
C. taihushanensis	35943--35969	12	2.2	12	100	0	54	22	18	7	51	1.7	TCTAGTTCTAAT
C. taihushanensis	38213--38237	13	1.9	13	100	0	50	88	0	12	0	0.53	AAAAAAGAAAAAG
C. taihushanensis	40570--40599	7	4.3	7	100	0	60	86	0	13	0	0.57	AAAAGAA
C. taihushanensis	45454--45496	20	2.1	19	83	12	50	76	0	13	9	1.01	AAAAGAGAAAATAAAAAAA
C. taihushanensis	45447--45501	26	2.1	27	86	3	76	76	0	16	7	1	AAAAAGGAAAAGAGATAAAAAAAAGAA
C. taihushanensis	45491--45524	17	1.9	17	88	5	50	67	0	2	29	1.05	AAAAAAAAAATAATTTT
Conidiobolus sp.	1463--1518	24	2.4	23	80	11	60	64	1	17	16	1.38	AAAAAGAATAGGTGAAGAAATAA
Conidiobolus sp.	6396--6450	24	2.3	24	75	6	58	54	0	9	36	1.32	ATTATTATTAATAGAGAAAATAAA
Conidiobolus sp.	12366--12401	18	2.1	17	89	5	54	50	0	13	36	1.43	AATATAATAATAGGATT
Conidiobolus sp.	15950--15979	7	4.3	7	91	0	51	83	0	16	0	0.65	AAAAGAA
Conidiobolus sp.	23064--23094	11	2.7	11	95	5	53	80	0	19	0	0.71	AGAAAAAAGAA
Neoconidiobolus thromboides	10062--10087	12	2.2	12	100	0	52	34	15	34	15	1.89	AGGAGCAGCATT	AGGAGCAGCATTAGGAGCAGCATTAG
Neoconidiobolus thromboides	16695--16727	15	2.3	15	89	5	50	54	9	18	18	1.69	CAATGGAAGAATAAA	CAATGGAAGTATAAACAATGGAAGAATAACAAT
Neoconidiobolus thromboides	17870--17921	22	2.4	22	80	6	61	48	3	0	48	1.2	TTTTTATAAAATTACAAAAATA	TTTTTATAAAATTAAAAAATTATTTTAATAAATTTACAAACATATTTTTATA
Neoconidiobolus thromboides	18213--18237	10	2.5	10	100	0	50	88	0	12	0	0.53	GAAAAAAAAA	GAAAAAAAAAGAAAAAAAAAGAAAA
Neoconidiobolus thromboides	18471--18512	21	2	21	86	9	59	71	0	14	14	1.15	ATAAAAAAGAGAGAAAATAAG	ATAAAAAAGATAGAAAATAAGATAAAAAAGAGAATAAATAAG
Neoconidiobolus thromboides	18462--18544	34	2.5	32	79	11	96	72	0	13	14	1.13	AAAAAAGAAATAAAAAAGATAGAAAATAAGAT	AAAAAAGAAATAAAAAAGATAGAAAATAAGATAAAAAAGAGAATAAATAAGGATATAGAGATAAATAAAATAGAAATAAAAAA
Neoconidiobolus thromboides	25650--25682	15	2.2	16	84	15	52	60	0	6	33	1.21	ATAAATAATAAGTATA	ATAAATAATAGTATAATAATAATAAGTATAATA
Neoconidiobolus thromboides	26792--26838	24	2	24	84	8	62	42	2	2	53	1.25	TTATATATAATATCTATAATATTA	TTATATATAGTATTTATAATATTATTATATATAATATCTAAATTTAT
Neoconidiobolus thromboides	29407--29455	18	2.8	17	84	6	53	63	0	2	34	1.06	AAAATAATTATAAAATT	AAAATAATAATGAAATATAAAATAATTATAAAATTAATAATATTTATAA
Neoconidiobolus thromboides	30935--30971	16	2.3	17	90	9	60	62	0	2	35	1.1	AATATTATATAATAAAG	AATATATATAATAAAAATATTATATAATAAAGAATAT
Microconidiobolus nodosus	1194--1225	16	1.9	17	93	6	57	81	0	12	6	0.87	TAAAGAAAAAGAAAAAG	TAAAGAAAAAGAAAAAGTAAAAAAAAGAAAAA
Microconidiobolus nodosus	1473--1517	21	2.1	21	84	8	56	73	2	8	15	1.18	AAATAAGAATAACAAAAGTAA	AAATAATAAAACAAGAAGTAAAAATAAGAATAATAAAAGTAAAAA
Microconidiobolus nodosus	6618--6684	28	2.6	25	80	15	73	71	0	17	10	1.13	AATAAAAGAAAAAAGAAGTAAGAAA	AATAAAAGAAAAGATGAAGTAAGAAAAGAGTAAAAGAAAAAAGTAGTTAAGAAAAAAAAAGAAAAAA
Microconidiobolus nodosus	8474--8517	13	3.4	13	84	6	54	84	0	11	4	0.77	AAAAAAAAAATAG	AAAAGAAAAAAGAGAAAAAGAAAATAGAAAAAAAAAATAAAAAA
Microconidiobolus nodosus	8820--8864	18	2.6	18	82	13	58	75	0	6	17	1.01	AATAGAAATAATAAAAAT	AATAAAATAAAAAAAATGAAAGAAATAATAAAAATAATAGAAATA
Microconidiobolus nodosus	9835--9878	7	5.9	7	82	15	52	79	0	18	2	0.83	AAAGAAA	AAAGATAAAAGAAAAAGAGAGAAAAAAGAAAAAAGAAAAAAGAA
Microconidiobolus nodosus	10665--10725	13	5.2	12	84	11	65	59	0	40	0	0.98	AAGGAAGAAGAG	AAGGAAGAGAGAGAAGGAAGAAGAGAGAGGAAGAAGGGAAGAAGAAGGAAGAAAAAGAGAA
Microconidiobolus nodosus	19516--19558	21	2	21	81	0	50	44	9	23	23	1.82	AACAGCATTAGGAGGAGGAAT	AACATCATTAGGATTAGGAATAACAGCATTAGGAGGAGTAATA
Microconidiobolus nodosus	22627--22720	18	5.2	18	85	0	134	48	11	22	17	1.78	TCAAACAATGAAGTAGAA	TCAAACAATGAAGTAGAATCAGACAATGGAGTAGAATCAAACAATGAAGTAGGATCAGACAATGGAGTAGAATCAAACAATGAAGTAGGATCAA
Microconidiobolus nodosus	22627--22719	36	2.6	36	98	0	177	48	11	22	17	1.79	TCAAACAATGAAGTAGGATCAGACAATGGAGTAGAA	TCAAACAATGAAGTAGAATCAGACAATGGAGTAGAATCAAACAATGAAGTAGGATCAGACAATGGAGTAGAATCAAACAATGAAGTAGGATCA
Microconidiobolus nodosus	22864--22908	24	1.9	23	82	13	56	40	2	13	44	1.56	TTTATATGAATACTAATGATAGT	TTTATATGGATACTAATAGATAGTTTTATATGTAATATAATGATA
Microconidiobolus nodosus	26239--26278	15	2.7	15	96	0	71	57	15	2	25	1.5	AATATACCAAATAAT	AATATACCAAATAATAATATACCAAATGATAATATACCAA
Microconidiobolus nodosus	26200--26265	24	2.8	24	92	0	105	60	15	0	24	1.35	AATAATAATATACCAAATAAACCA	AATAATAATATACCAAACAAATCAAATAATAATATACCAAATATACCAAATAATAATATACCAAAT
Microconidiobolus nodosus	30323--30385	33	1.9	33	87	6	92	53	7	20	17	1.68	AATAGAAATGGCAAAGATAGAATCAAATGAAAG	AATAGAAATGGCTAAAATAGAATCAAATGAAAGAATAGAGATGGCAAAGATAGCATCAAATGA
Capillidium heterosporum	4670--4715	21	2.2	21	100	0	92	15	32	32	19	1.93	CAGTCCCCCTTGAGGGGACTG	CAGTCCCCCTTGAGGGGACTGCAGTCCCCCTTGAGGGGACTGCAGT
Capillidium heterosporum	11698--11750	27	2	27	100	0	106	22	28	30	18	1.98	CGGTAGGTACGTACGTACCATACCGGC	CGGTAGGTACGTACGTACCATACCGGCCGGTAGGTACGTACGTACCATACCGG
Capillidium heterosporum	12756--12783	14	2	14	100	0	56	28	21	35	14	1.92	CCCGTATAAGGGGA	CCCGTATAAGGGGACCCGTATAAGGGGA
Capillidium heterosporum	23207--23238	15	2.1	15	100	0	64	40	0	25	34	1.56	TATGGAGGATAAATT	TATGGAGGATAAATTTATGGAGGATAAATTTA
Capillidium heterosporum	27073--27106	18	1.9	17	88	5	50	50	0	14	35	1.44	TAGAATAGAATATAATT	TAGAATAGAATGTAATTTAGAATTAGAATATAAT
Capillidium heterosporum	32393--32446	27	2	27	100	0	108	29	25	29	14	1.95	AGCGGTAGGTACGAACGTACCATACCG	AGCGGTAGGTACGAACGTACCATACCGAGCGGTAGGTACGAACGTACCATACCG
Capillidium heterosporum	37566--37624	21	2.6	23	75	17	61	59	0	32	8	1.28	GAGGAAGAGATAAAAGAAGAATA	GAGGAAGAGATAAAAGAGATAGAGGGGAAGATAAAAGAAAGAATAAAGGAAGAGATAAA
Capillidium heterosporum	45977--46073	38	2.4	40	85	11	128	64	0	25	9	1.23	AAGAAAAGAAAAAAAGGATAGAGGGAAAAGAATGAAATAA	AAGAATAGAAAGAAAAGGATAGAGGGAAAATATGAATAGAAAGAAAAGAAAAAAGGATAGAGGGAAAAGAATGATAATAAAAGAAAAGAAAAAAAGG
Capillidium heterosporum	46901--46976	24	2.8	26	72	22	68	56	0	10	32	1.33	AATAATAATATTAAGTATAATAAGAG	AATAATAATATTATATGTATTATATAAGAGAATAATAAGAAAGATAAGTAATAGAATAATAATATTAAGTATAATA
Capillidium heterosporum	48134--48166	12	2.8	12	86	13	50	75	0	21	3	0.93	AAAGAAGAAAGA	AAAGAAGAAAGAAAAGAAAAAGAAATAGAAGAA

## Sheet: TableS8 SSRs 
Table S8. Simple sequence repeats found in ten Conidiobolus s.l. mitogenomes
Sequence	Motif	No.of Repeats	SSR start	SSR end	SeqLength
C. chlamydosporus	ta	5	7241	7250	29253
C. chlamydosporus	at	9	21896	21913	29253
C. chlamydosporus	at	5	24953	24962	29253
C. chlamydosporus	gaa	5	20549	20563	29253
C. chlamydosporus	att	6	22588	22605	29253
C. chlamydosporus	tat	5	22842	22856	29253
C. chlamydosporus	aata	7	22100	22127	29253
C. chlamydosporus	aaaaaac	5	25648	25682	29253
C. lichenicolus	at	7	893	906	42713
C. lichenicolus	at	5	2397	2406	42713
C. lichenicolus	ta	6	6142	6153	42713
C. lichenicolus	at	5	17048	17057	42713
C. lichenicolus	ta	5	24533	24542	42713
C. lichenicolus	tat	5	1403	1417	42713
C. lichenicolus	tat	5	2746	2760	42713
C. lichenicolus	gaa	5	42245	42259	42713
C. mycophagus	at	5	4790	4799	32218
C. mycophagus	ta	5	12301	12310	32218
C. mycophagus	at	7	27897	27910	32218
C. mycophagus	gaa	5	26536	26550	32218
C. mycophagus	tat	5	28407	28421	32218
C. mycophagus	tat	5	28656	28670	32218
C. polyspermus	at	11	3360	3381	32900
C. polyspermus	ta	6	7209	7220	32900
C. polyspermus	at	5	8296	8305	32900
C. polyspermus	ta	5	19983	19992	32900
C. polyspermus	gaa	5	2007	2021	32900
C. polyspermus	tat	5	3888	3902	32900
C. polyspermus	tat	5	5254	5268	32900
C. polytocus	at	6	691	702	43599
C. polytocus	ta	5	3100	3109	43599
C. polytocus	at	7	22739	22752	43599
C. polytocus	ta	6	27975	27986	43599
C. polytocus	at	5	30088	30097	43599
C. polytocus	gaa	5	21378	21392	43599
C. polytocus	tat	5	23257	23271	43599
C. polytocus	tat	5	24709	24723	43599
C. polytocus	aat	6	33674	33691	43599
C. taihushanensis	at	5	6650	6659	48417
C. taihushanensis	ta	6	10884	10895	48417
C. taihushanensis	at	5	12632	12641	48417
C. taihushanensis	at	5	13672	13681	48417
C. taihushanensis	at	5	16512	16521	48417
C. taihushanensis	ta	5	23501	23510	48417
C. taihushanensis	ta	5	28213	28222	48417
C. taihushanensis	ta	5	34932	34941	48417
C. taihushanensis	gaa	5	5289	5303	48417
C. taihushanensis	tat	5	7153	7167	48417
C. taihushanensis	tat	5	8486	8500	48417
C. taihushanensis	aat	6	20054	20071	48417
Conidiobolus sp.	at	5	1527	1536	26612
Conidiobolus sp.	ta	5	11987	11996	26612
Conidiobolus sp.	at	5	18178	18187	26612
Conidiobolus sp.	at	5	26428	26437	26612
Conidiobolus sp.	tat	5	332	346	26612
Conidiobolus sp.	tat	5	581	595	26612
Conidiobolus sp.	gaa	5	25067	25081	26612
Neoconidiobolus thromboides	ta	5	22208	22217	34984
Neoconidiobolus thromboides	ta	5	23417	23426	34984
Neoconidiobolus thromboides	at	5	23499	23508	34984
Neoconidiobolus thromboides	ta	6	25119	25130	34984
Neoconidiobolus thromboides	at	6	29326	29337	34984
Neoconidiobolus thromboides	ta	5	30902	30911	34984
Neoconidiobolus thromboides	tat	5	5071	5085	34984
Neoconidiobolus thromboides	tat	5	5320	5334	34984
Microconidiobolus nodosus	at	6	14524	14535	31638
Microconidiobolus nodosus	at	7	22979	22992	31638
Microconidiobolus nodosus	at	5	27736	27745	31638
Microconidiobolus nodosus	aga	6	1435	1452	31638
Microconidiobolus nodosus	tat	5	10037	10051	31638
Microconidiobolus nodosus	tat	5	24822	24836	31638
Capillidium heterosporum	at	5	5740	5749	53364
Capillidium heterosporum	ga	5	12918	12927	53364
Capillidium heterosporum	at	5	30631	30640	53364
Capillidium heterosporum	at	5	32274	32283	53364
Capillidium heterosporum	ta	5	34107	34116	53364
Capillidium heterosporum	ta	5	41205	41214	53364
Capillidium heterosporum	ta	5	41283	41292	53364
Capillidium heterosporum	ta	5	45005	45014	53364
Capillidium heterosporum	at	5	45116	45125	53364
Capillidium heterosporum	ta	6	46413	46424	53364
Capillidium heterosporum	at	5	51017	51026	53364
Capillidium heterosporum	aag	5	12822	12836	53364
Capillidium heterosporum	tat	5	15664	15678	53364
Capillidium heterosporum	tat	5	18554	18568	53364
Capillidium heterosporum	taa	5	46480	46494	53364
Capillidium heterosporum	tta	6	50971	50988	53364

## Sheet: TableS9 Blast to nuclear genome
Table S9. BLAST searches of nine Conidiobolus s.l. mitogenomes against their nuclear genomes
Query name	Reference name	Percent identity	Aligment length	Mismatch	Gap opens	Query start	Query end	Reference start	Reference end	E-value	Bit score
C. lichenicolus	Scaffold5976	81.29	326	42	5	33963	34288	380	74	6e-34	151
C. polytocus	Scaffold1500	82.82	163	22	3	10975	11137	11	167	8e-14	83.8
C. taihushanensis	Scaffold2220	83.05	118	20	0	10503	10620	483	600	3e-11	75.8
C. polyspermus	Scaffold10273	83.47	121	20	0	28517	28637	359	479	6e-13	81.8
C. mycophagus	Scaffold5013	83.86	347	56	0	25876	26222	396	50	4e-62	244
C. polytocus	Scaffold1036	84.3	121	19	0	10767	10887	457	577	1e-15	89.7
C. mycophagus	Scaffold2743	84.3	121	19	0	20175	20295	184	304	2e-15	89.7
C. polytocus	Scaffold446	84.58	240	36	1	28642	28881	2495	2733	2e-30	139
C. polytocus	Scaffold945	85.11	94	14	0	19472	19565	111	18	2e-11	75.8
C. mycophagus	Scaffold1284	85.11	94	14	0	5042	5135	5395	5302	2e-11	75.8
C. taihushanensis	Scaffold1732	85.15	202	24	5	29537	29737	76	272	3e-26	125
C. taihushanensis	Scaffold2683	85.19	81	12	0	15438	15518	178	258	3e-08	65.9
C. polyspermus	Scaffold8436	85.39	89	13	0	28517	28605	808	720	1e-10	73.8
C. lichenicolus	Scaffold4014	85.39	89	13	0	32596	32684	963	875	1e-10	73.8
C. polyspermus	Scaffold16279	85.61	139	16	4	23527	23663	324	188	4e-14	85.7
C. taihushanensis	Scaffold1732	85.78	211	27	3	12239	12448	145	353	9e-36	157
C. polytocus	Scaffold1500	85.98	107	14	1	11223	11329	249	354	2e-14	85.7
C. lichenicolus	Scaffold7809	86.05	86	12	0	39323	39408	97	182	3e-11	75.8
C. polytocus	Scaffold1058	86.07	122	17	0	25483	25604	382	261	5e-21	107
C. taihushanensis	Scaffold2683	86.08	79	11	0	15607	15685	347	425	2e-09	69.9
C. mycophagus	Scaffold3600	86.27	386	44	3	18927	19312	532	156	9e-79	299
C. taihushanensis	Scaffold2487	86.3	73	10	0	27398	27470	13	85	3e-08	65.9
C. lichenicolus	Scaffold8107	87.3	63	8	0	37097	37159	280	218	4e-07	61.9
C. mycophagus	Scaffold7770	87.32	71	9	0	21261	21331	185	255	1e-09	69.9
C. taihushanensis	Scaffold2557	87.38	325	33	6	44149	44472	18	335	1e-71	276
C. polytocus	Scaffold1425	87.5	64	8	0	40365	40428	3	66	7e-08	63.9
C. lichenicolus	Scaffold5288	87.5	64	8	0	29243	29306	557	494	1e-07	63.9
C. lichenicolus	Scaffold2196	87.72	57	7	0	7345	7401	3768	3824	7e-06	58
C. taihushanensis	Scaffold1732	87.72	57	7	0	12687	12743	590	646	6e-06	58
C. lichenicolus	Scaffold5976	88.52	61	7	0	33837	33897	452	392	3e-08	65.9
C. polyspermus	Scaffold18259	89	100	11	0	271	370	1	100	6e-22	111
C. polyspermus	Scaffold19028	89.04	73	8	0	22679	22751	54	126	6e-13	81.8
C. taihushanensis	Scaffold2675	89.09	55	6	0	11804	11858	376	430	4e-07	61.9
C. polytocus	Scaffold446	89.47	57	6	0	13953	14009	2041	2097	2e-08	65.9
C. taihushanensis	Scaffold2028	89.47	57	6	0	46714	46770	303	359	3e-08	65.9
C. taihushanensis	Scaffold1341	89.66	58	6	0	2846	2903	1652	1595	7e-09	67.9
C. mycophagus	Scaffold5656	89.67	368	27	2	18308	18674	10	367	7e-104	383
C. polyspermus	Scaffold8436	89.8	49	5	0	27982	28030	1408	1360	8e-06	58
C. lichenicolus	Scaffold2040	89.8	49	5	0	32061	32109	4151	4199	7e-06	58
C. taihushanensis	Scaffold2975	89.84	128	13	0	8266	8393	21	148	6e-34	151
C. taihushanensis	Scaffold3137	89.9	99	10	0	30098	30196	103	5	8e-24	117
C. lichenicolus	Scaffold2040	90	50	5	0	32635	32684	4793	4842	2e-06	60
C. mycophagus	Scaffold1947	90	50	5	0	19639	19688	2535	2584	1e-06	60
C. mycophagus	Scaffold1705	90	50	5	0	20214	20263	904	855	1e-06	60
C. polyspermus	Scaffold19028	90.12	172	13	2	22858	23029	130	297	5e-47	194
C. polytocus	Scaffold1642	90.29	103	10	0	35761	35863	273	375	2e-26	125
C. taihushanensis	Scaffold3310	90.36	83	8	0	24248	24330	1	83	5e-19	101
C. taihushanensis	Scaffold1846	90.42	167	16	0	34874	35040	852	686	4e-50	204
C. polyspermus	Scaffold7172	90.74	54	5	0	5468	5521	1787	1734	8e-09	67.9
C. polyspermus	Scaffold11386	90.74	54	5	0	4179	4232	281	228	8e-09	67.9
C. polytocus	Scaffold1776	90.91	55	5	0	15063	15117	107	53	1e-09	69.9
C. polyspermus	Scaffold9584	90.91	55	5	0	5827	5881	1455	1509	2e-09	69.9
C. lichenicolus	Scaffold8107	91.23	57	5	0	5179	5235	280	224	1e-10	73.8
C. taihushanensis	Scaffold1059	91.23	57	5	0	9991	10047	741	797	1e-10	73.8
C. lichenicolus	Scaffold8412	91.3	46	4	0	36673	36718	156	111	2e-06	60
C. mycophagus	Scaffold2575	91.3	46	4	0	20930	20975	379	334	1e-06	60
C. taihushanensis	Scaffold3294	91.35	104	9	0	1683	1786	309	206	2e-21	109
C. lichenicolus	Scaffold2817	91.38	58	5	0	37097	37154	1323	1266	3e-11	75.8
C. lichenicolus	Scaffold7445	91.38	58	5	0	5179	5236	264	207	3e-11	75.8
C. taihushanensis	Scaffold3072	91.49	329	14	4	37406	37722	34	360	2e-114	418
C. lichenicolus	Scaffold8107	91.53	59	5	0	35965	36023	279	221	7e-12	77.8
C. taihushanensis	Scaffold1914	91.6	119	10	0	33449	33567	1	119	9e-36	157
C. polytocus	Scaffold1684	91.67	60	5	0	29328	29387	66	7	1e-12	79.8
C. lichenicolus	Scaffold2196	91.67	48	4	0	20445	20492	4067	4114	1e-07	63.9
C. polyspermus	Scaffold16279	91.78	73	4	1	23716	23788	172	102	6e-16	91.7
C. polytocus	Scaffold1153	91.8	61	5	0	27690	27750	396	456	3e-13	81.8
C. taihushanensis	Scaffold2557	92	50	4	0	44571	44620	421	470	7e-09	67.9
C. mycophagus	Scaffold6519	92.11	228	18	0	1986	2213	108	335	9e-82	309
C. polyspermus	Scaffold4178	92.16	51	4	0	30923	30973	2656	2706	2e-09	69.9
C. taihushanensis	Scaffold2627	92.79	111	8	0	38869	38979	10	120	9e-36	157
C. polytocus	Scaffold446	92.86	56	4	0	15063	15118	2041	2096	1e-12	79.8
C. polytocus	Scaffold1153	92.86	42	3	0	27524	27565	229	270	1e-06	60
C. polytocus	Scaffold224	92.86	56	4	0	27071	27126	24289	24234	1e-12	79.8
C. taihushanensis	Scaffold1059	92.86	56	4	0	46714	46769	1859	1914	2e-12	79.8
C. mycophagus	Scaffold1992	92.98	57	4	0	29968	30024	2091	2147	4e-13	81.8
C. mycophagus	Scaffold2227	92.98	57	4	0	23532	23588	1027	1083	4e-13	81.8
C. taihushanensis	Scaffold2028	92.98	57	4	0	47830	47886	302	358	4e-13	81.8
C. taihushanensis	Scaffold1059	92.98	57	4	0	9990	10046	1858	1914	4e-13	81.8
C. polytocus	Scaffold1425	93.1	58	4	0	40739	40796	377	434	8e-14	83.8
C. taihushanensis	Scaffold3294	93.15	146	10	0	1838	1983	154	9	7e-52	210
C. mycophagus	Scaffold4631	93.18	44	3	0	20930	20973	190	233	9e-08	63.9
C. taihushanensis	Scaffold3240	93.24	148	10	0	40893	41040	163	16	5e-53	214
C. polyspermus	Scaffold2234	93.26	89	6	0	25770	25858	6224	6136	3e-27	129
C. taihushanensis	Scaffold1216	93.3	194	13	0	6292	6485	2073	1880	2e-73	281
C. taihushanensis	Scaffold1603	93.36	226	15	0	20493	20718	229	4	1e-87	329
C. mycophagus	Scaffold3712	93.4	530	16	2	31142	31671	1	511	0	791
C. taihushanensis	Scaffold2220	93.55	62	4	0	12269	12330	504	565	5e-16	91.7
C. mycophagus	Scaffold3600	93.59	78	5	0	19387	19464	78	1	3e-23	115
C. lichenicolus	Scaffold5288	93.87	163	10	0	29629	29791	171	9	5e-62	244
C. taihushanensis	Scaffold2801	93.98	83	5	0	23336	23418	408	326	3e-26	125
C. mycophagus	Scaffold7155	94.06	303	17	1	23354	23656	321	20	5e-114	416
C. taihushanensis	Scaffold2472	94.06	101	6	0	17906	18006	395	495	1e-34	153
C. polytocus	Scaffold1598	94.07	118	7	0	8652	8769	133	16	2e-42	178
C. mycophagus	Scaffold4804	94.12	85	5	0	13117	13201	294	378	2e-27	129
C. taihushanensis	Scaffold1887	94.15	171	10	0	15603	15773	171	1	9e-67	260
C. polyspermus	Scaffold5245	94.16	154	9	0	20953	21106	4121	3968	6e-59	234
C. polytocus	Scaffold1707	94.17	120	7	0	42777	42896	2	121	1e-43	182
C. polyspermus	Scaffold8562	94.17	103	6	0	30923	31025	1947	1845	1e-35	157
C. mycophagus	Scaffold6028	94.35	248	9	1	14626	14868	253	6	3e-103	381
C. mycophagus	Scaffold6055	94.38	356	20	0	3997	4352	1	356	2e-153	547
C. taihushanensis	Scaffold3137	94.44	126	7	0	29856	29981	345	220	4e-47	194
C. taihushanensis	Scaffold3300	94.48	308	17	0	35976	36283	308	1	8e-132	476
C. polytocus	Scaffold1578	94.55	55	3	0	30178	30232	382	328	2e-14	85.7
C. polytocus	Scaffold857	94.58	240	11	1	7147	7386	1	238	3e-87	327
C. polyspermus	Scaffold2234	94.59	37	2	0	25585	25621	6578	6542	8e-06	58
C. polyspermus	Scaffold4178	94.59	37	2	0	30583	30619	2656	2692	8e-06	58
C. polyspermus	Scaffold8562	94.59	37	2	0	30583	30619	1947	1911	8e-06	58
C. lichenicolus	Scaffold4324	94.59	37	2	0	4552	4588	642	606	7e-06	58
C. lichenicolus	Scaffold2817	94.59	37	2	0	3370	3406	1534	1498	7e-06	58
C. taihushanensis	Scaffold1059	94.64	56	3	0	47831	47886	741	796	7e-15	87.7
C. polyspermus	Scaffold2234	94.74	38	2	0	25585	25622	6186	6149	2e-06	60
C. mycophagus	Scaffold7155	94.74	57	3	0	29968	30024	144	88	2e-15	89.7
C. polyspermus	Scaffold8562	94.83	58	3	0	30577	30634	1849	1792	6e-16	91.7
C. mycophagus	Scaffold4291	94.83	58	3	0	3452	3509	215	158	4e-16	91.7
C. taihushanensis	Scaffold3244	94.92	295	5	4	21449	21733	25	319	7e-123	446
C. lichenicolus	Scaffold7782	95	40	2	0	3370	3409	95	134	1e-07	63.9
C. mycophagus	Scaffold1909	95	40	2	0	30630	30669	1275	1236	9e-08	63.9
C. mycophagus	Scaffold4418	95.26	190	9	0	3570	3759	195	6	1e-80	305
C. polytocus	Scaffold1776	95.28	339	16	0	13721	14059	339	1	7e-153	545
C. polyspermus	Scaffold8562	95.29	85	4	0	30917	31001	1901	1817	1e-29	137
C. polyspermus	Scaffold2234	95.35	43	2	0	25854	25896	6584	6542	2e-09	69.9
C. polyspermus	Scaffold2234	95.35	43	2	0	25802	25844	6584	6542	2e-09	69.9
C. polyspermus	Scaffold8562	95.35	43	2	0	30577	30619	1901	1859	2e-09	69.9
C. mycophagus	Scaffold4751	95.35	86	4	0	9720	9805	327	412	2e-30	139
C. taihushanensis	Scaffold496	95.35	43	2	0	28253	28295	10152	10194	2e-09	69.9
C. lichenicolus	Scaffold8338	95.39	304	14	0	37269	37572	304	1	3e-122	444
C. polyspermus	Scaffold14622	95.45	44	2	0	29272	29315	352	309	5e-10	71.9
C. taihushanensis	Scaffold3100	95.5	111	5	0	27354	27464	201	311	7e-43	180
C. polyspermus	Scaffold2234	95.56	90	4	0	1321	1410	6616	6527	1e-32	147
C. mycophagus	Scaffold2619	95.6	159	7	0	14352	14510	220	62	7e-67	260
C. polytocus	Scaffold392	95.62	525	8	1	43090	43599	7	531	0	876
C. polytocus	Scaffold363	95.65	46	2	0	28731	28776	12594	12639	2e-11	75.8
C. polytocus	Scaffold1510	95.65	46	2	0	5306	5351	135	180	2e-11	75.8
C. polyspermus	Scaffold12327	95.65	115	4	1	12859	12972	330	216	8e-43	180
C. polyspermus	Scaffold13887	95.65	184	8	0	13802	13985	545	362	3e-79	301
C. taihushanensis	Scaffold3241	95.7	302	13	0	16437	16738	1	302	9e-138	496
C. taihushanensis	Scaffold3100	95.71	70	3	0	27168	27237	15	84	3e-23	115
C. polyspermus	Scaffold2234	95.74	141	6	0	25802	25942	6244	6104	3e-58	232
C. polytocus	Scaffold1712	95.75	353	15	0	31623	31975	1	353	1e-163	581
C. polytocus	Scaffold916	95.75	259	11	0	33869	34127	907	1165	4e-117	426
C. mycophagus	Scaffold7627	95.77	260	11	0	11825	12084	3	262	1e-117	428
C. mycophagus	Scaffold3352	95.88	97	4	0	17257	17353	97	1	5e-37	161
C. polytocus	Scaffold1684	96	150	6	0	29053	29202	341	192	6e-64	250
C. taihushanensis	Scaffold2676	96	375	15	0	17909	18283	412	38	1e-176	624
C. polyspermus	Scaffold7172	96.08	51	2	0	5831	5881	1422	1372	4e-14	85.7
C. polyspermus	Scaffold12327	96.3	81	3	0	23754	23834	253	173	1e-29	137
C. polytocus	Scaffold224	96.43	56	2	0	13953	14008	24289	24234	2e-17	95.6
C. lichenicolus	Scaffold4038	96.43	56	2	0	37098	37153	419	474	3e-17	95.6
C. lichenicolus	Scaffold7445	96.43	56	2	0	35965	36020	263	208	3e-17	95.6
C. mycophagus	Scaffold7315	96.5	143	5	0	28691	28833	171	313	4e-62	244
C. lichenicolus	Scaffold7782	96.52	115	4	0	21037	21151	100	214	1e-47	196
C. polyspermus	Scaffold3	96.55	58	2	0	12107	12164	31016	31073	2e-18	99.6
C. polytocus	Scaffold1349	96.58	146	5	0	7682	7827	6	151	6e-64	250
C. polytocus	Scaffold653	96.68	241	8	0	20683	20923	1	241	2e-113	414
C. taihushanensis	Scaffold1887	96.71	365	11	1	14957	15320	818	454	3e-159	567
C. polytocus	Scaffold857	96.75	400	13	0	7383	7782	1069	1468	0	690
C. polytocus	Scaffold446	96.77	62	2	0	25242	25303	1367	1428	5e-21	107
C. lichenicolus	Scaffold460	96.77	62	2	0	29690	29751	13906	13967	8e-21	107
C. mycophagus	Scaffold2589	96.84	253	7	1	15568	15820	312	61	4e-118	430
C. taihushanensis	Scaffold1928	96.84	601	18	1	42058	42658	786	187	0	991
C. polytocus	Scaffold1826	96.85	127	4	0	9797	9923	317	191	5e-55	220
C. polytocus	Scaffold294	96.88	64	2	0	2864	2927	3584	3521	3e-22	111
C. taihushanensis	Scaffold3299	96.88	288	9	0	32115	32402	308	21	5e-139	500
C. lichenicolus	Scaffold7950	96.92	227	7	0	21268	21494	276	50	2e-107	394
C. taihushanensis	Scaffold3067	96.95	361	11	0	2444	2804	3	363	9e-178	628
C. taihushanensis	Scaffold2220	96.97	33	1	0	12078	12110	319	351	6e-06	58
C. taihushanensis	Scaffold3057	96.99	266	8	0	11156	11421	1	266	1e-115	422
C. polytocus	Scaffold194	97.01	435	11	2	34588	35021	29	462	0	743
C. lichenicolus	Scaffold4038	97.03	269	8	0	36346	36614	797	1065	5e-130	470
C. taihushanensis	Scaffold1603	97.03	101	3	0	19685	19785	1032	932	1e-41	176
C. polytocus	Scaffold1153	97.06	34	1	0	41618	41651	331	364	1e-06	60
C. polytocus	Scaffold1739	97.06	306	9	0	25693	25998	1	306	7e-150	535
C. taihushanensis	Scaffold2627	97.07	205	5	1	39069	39272	210	414	7e-80	303
C. polyspermus	Scaffold18579	97.09	206	6	0	24773	24978	1	206	4e-97	361
C. polytocus	Scaffold1064	97.14	35	1	0	24785	24819	505	539	3e-07	61.9
C. taihushanensis	Scaffold2438	97.18	497	14	0	32376	32872	8	504	0	833
C. polyspermus	Scaffold5245	97.22	36	1	0	12937	12972	1319	1284	1e-07	63.9
C. mycophagus	Scaffold2765	97.22	396	11	0	19387	19782	535	930	0	698
C. mycophagus	Scaffold3072	97.25	109	3	0	12301	12409	702	594	1e-46	192
C. lichenicolus	Scaffold6541	97.26	401	10	1	36533	36932	1	401	1e-158	565
C. polyspermus	Scaffold88	97.27	110	1	1	6221	6330	23984	23877	3e-45	188
C. lichenicolus	Scaffold7995	97.28	147	4	0	1848	1994	1	147	9e-67	260
C. polytocus	Scaffold1826	97.3	111	3	0	9994	10104	121	11	8e-48	196
C. polyspermus	Scaffold8562	97.3	37	1	0	25585	25621	1895	1859	3e-08	65.9
C. taihushanensis	Scaffold2650	97.3	407	10	1	789	1195	1	406	0	664
C. polytocus	Scaffold1571	97.31	297	8	0	37407	37703	1	297	6e-147	525
C. lichenicolus	Scaffold3754	97.31	335	9	0	22351	22685	1016	1350	5e-167	593
C. lichenicolus	Scaffold2848	97.32	299	8	0	22552	22850	2866	2568	6e-148	529
C. polytocus	Scaffold1212	97.33	262	6	1	29328	29589	555	295	5e-126	456
C. taihushanensis	Scaffold2373	97.35	528	13	1	23698	24225	2	528	0	850
C. taihushanensis	Scaffold2534	97.36	454	11	1	1055	1508	3	455	0	757
C. polyspermus	Scaffold5245	97.37	38	1	0	13716	13753	1321	1284	8e-09	67.9
C. taihushanensis	Scaffold1410	97.37	76	2	0	25676	25751	22	97	3e-29	135
C. taihushanensis	Scaffold1914	97.4	578	14	1	33668	34244	220	797	0	930
C. polytocus	Scaffold1262	97.41	502	12	1	18593	19094	43	543	0	771
C. taihushanensis	Scaffold3268	97.41	309	8	0	1888	2196	309	1	7e-154	549
C. lichenicolus	Scaffold3023	97.43	272	7	0	40292	40563	294	23	3e-134	484
C. polyspermus	Scaffold8562	97.44	39	1	0	25583	25621	1949	1911	2e-09	69.9
C. taihushanensis	Scaffold2383	97.45	431	10	1	8661	9091	525	96	0	718
C. polytocus	Scaffold446	97.5	40	1	0	1609	1648	905	944	3e-10	71.9
C. lichenicolus	Scaffold3768	97.5	40	1	0	2953	2992	923	962	4e-10	71.9
C. lichenicolus	Scaffold3754	97.5	40	1	0	20769	20808	176	215	4e-10	71.9
C. lichenicolus	Scaffold2817	97.5	40	1	0	7970	8009	2066	2027	4e-10	71.9
C. polyspermus	Scaffold3	97.56	41	1	0	12315	12355	31065	31105	1e-10	73.8
C. polyspermus	Scaffold4178	97.59	83	2	0	30975	31057	2656	2738	3e-33	149
C. mycophagus	Scaffold2174	97.62	168	4	0	5202	5369	1968	1801	2e-79	301
C. mycophagus	Scaffold2174	97.62	168	2	1	5433	5598	1737	1570	1e-77	295
C. lichenicolus	Scaffold3520	97.65	213	5	0	26102	26314	1646	1434	9e-104	383
C. polytocus	Scaffold363	97.66	728	2	1	40997	41709	11970	12697	0	1197
C. taihushanensis	Scaffold2524	97.66	470	10	1	20815	21283	6	475	0	747
C. lichenicolus	Scaffold5451	97.69	347	6	1	10477	10823	1	345	9e-175	618
C. mycophagus	Scaffold2227	97.72	263	6	0	28942	29204	2	264	3e-131	474
C. taihushanensis	Scaffold3094	97.77	314	6	1	18624	18937	1	313	7e-157	559
C. chlamydosporus	Scaffold3646	97.78	45	1	0	25213	25257	1386	1342	7e-13	81.8
C. taihushanensis	Scaffold2220	97.78	45	1	0	10425	10469	402	446	4e-13	81.8
C. taihushanensis	Scaffold2053	97.78	135	3	0	5712	5846	703	569	5e-62	244
C. mycophagus	Scaffold7886	97.8	91	2	0	30270	30360	130	40	3e-38	165
C. taihushanensis	Scaffold1799	97.82	229	5	0	19383	19611	546	774	2e-113	414
C. polytocus	Scaffold1074	97.83	460	9	1	6198	6656	466	7	0	771
C. taihushanensis	Scaffold1429	97.85	419	8	1	30298	30716	1437	1020	0	751
C. chlamydosporus	Scaffold2415	97.86	234	5	0	7827	8060	7939	7706	4e-116	424
C. mycophagus	Scaffold3985	97.86	327	5	1	2914	3240	435	111	3e-165	587
C. lichenicolus	Scaffold3024	97.9	238	5	0	32739	32976	1	238	1e-118	432
C. mycophagus	Scaffold7078	97.91	287	6	0	4233	4519	19	305	1e-145	521
C. taihushanensis	Scaffold496	97.92	48	1	0	28060	28107	10087	10134	7e-15	87.7
C. taihushanensis	Scaffold1732	97.97	543	8	2	10755	11296	405	945	0	815
C. polyspermus	Scaffold7172	98.01	302	6	0	18820	19121	1418	1117	2e-154	551
C. mycophagus	Scaffold4029	98.01	452	9	0	30650	31101	465	14	0	777
C. taihushanensis	Scaffold3325	98.03	254	4	1	8518	8771	303	51	7e-126	456
C. polytocus	Scaffold945	98.04	460	8	1	17831	18290	1055	597	0	833
C. mycophagus	Scaffold1730	98.05	1076	7	1	1	1076	3211	2150	0	1984
C. taihushanensis	Scaffold2472	98.05	307	6	0	17512	17818	1	307	2e-157	561
C. mycophagus	Scaffold4751	98.08	261	4	1	9395	9654	1	261	4e-130	470
C. chlamydosporus	Scaffold7200	98.09	209	4	0	15627	15835	3999	3791	1e-103	383
C. lichenicolus	Scaffold5898	98.1	473	9	0	10130	10602	473	1	0	866
C. lichenicolus	Scaffold6795	98.14	269	4	1	35342	35610	129	396	5e-124	450
C. chlamydosporus	Scaffold14619	98.15	542	10	0	4860	5401	1694	1153	0	954
C. polytocus	Scaffold1209	98.15	162	3	0	38502	38663	407	568	3e-78	297
C. lichenicolus	Scaffold4038	98.15	758	11	1	35547	36304	1	755	0	1340
C. taihushanensis	Scaffold427	98.18	55	1	0	23915	23969	18250	18196	5e-19	101
C. polytocus	Scaffold177	98.19	496	0	1	16267	16753	1407	912	0	920
C. taihushanensis	Scaffold3130	98.2	278	5	0	14814	15091	1	278	1e-142	511
C. mycophagus	Scaffold3072	98.23	226	3	1	12727	12951	277	52	3e-97	361
C. lichenicolus	Scaffold3913	98.25	572	10	0	23725	24296	1175	604	0	1055
C. taihushanensis	Scaffold2864	98.25	114	2	0	27025	27138	324	211	7e-52	210
C. polyspermus	Scaffold8562	98.28	523	9	0	2655	3177	548	26	0	965
C. lichenicolus	Scaffold6637	98.28	116	2	0	14412	14527	295	410	5e-53	214
C. taihushanensis	Scaffold2516	98.3	470	7	1	39185	39653	1	470	0	777
C. polytocus	Scaffold1074	98.31	178	3	0	5860	6037	805	628	8e-88	329
C. polytocus	Scaffold1029	98.33	239	4	0	36081	36319	1	239	8e-122	442
C. taihushanensis	Scaffold3313	98.33	180	2	1	13187	13366	127	305	6e-74	283
C. lichenicolus	Scaffold4067	98.34	1024	15	2	8451	9474	24	1045	0	1838
C. mycophagus	Scaffold4418	98.34	181	3	0	3336	3516	429	249	5e-77	293
C. taihushanensis	Scaffold3254	98.36	244	3	1	14614	14857	287	45	3e-122	444
C. taihushanensis	Scaffold1748	98.38	309	5	0	13861	14169	340	32	1e-146	525
C. taihushanensis	Scaffold2713	98.4	125	2	0	14045	14169	5	129	2e-58	232
C. lichenicolus	Scaffold3468	98.41	567	8	1	31181	31747	1	566	0	1003
C. taihushanensis	Scaffold2487	98.44	321	4	1	27554	27874	171	490	8e-166	589
C. lichenicolus	Scaffold7937	98.46	324	5	0	16474	16797	4	327	5e-170	603
C. lichenicolus	Scaffold8419	98.47	131	2	0	23457	23587	9	139	5e-62	244
C. polytocus	Scaffold224	98.48	66	1	0	15675	15740	23791	23726	9e-26	123
C. lichenicolus	Scaffold6533	98.48	66	1	0	23336	23401	7	72	1e-25	123
C. taihushanensis	Scaffold1066	98.5	334	3	2	38331	38663	1755	2087	1e-158	565
C. polytocus	Scaffold177	98.53	68	1	0	17830	17897	68	1	6e-27	127
C. polytocus	Scaffold1319	98.55	482	6	1	35767	36247	28	509	0	839
C. taihushanensis	Scaffold2495	98.56	348	4	1	21640	21987	414	68	0	642
C. taihushanensis	Scaffold3279	98.57	279	4	0	15991	16269	310	32	1e-145	521
C. taihushanensis	Scaffold1563	98.58	564	8	0	44862	45425	2	565	0	1013
C. chlamydosporus	Scaffold2415	98.59	781	9	2	14973	15753	794	16	0	1409
C. lichenicolus	Scaffold7445	98.59	213	3	0	37002	37214	359	147	2e-108	398
C. polytocus	Scaffold392	98.6	143	2	0	517	659	976	1118	3e-59	234
C. polytocus	Scaffold1447	98.6	285	4	0	37811	38095	118	402	9e-137	492
C. mycophagus	Scaffold17	98.61	72	1	0	18931	19002	8367	8438	3e-29	135
C. lichenicolus	Scaffold3468	98.63	1098	15	0	31808	32905	627	1724	0	2058
C. polyspermus	Scaffold7172	98.64	883	12	0	19195	20077	1043	161	0	1655
C. taihushanensis	Scaffold1799	98.65	371	4	1	18837	19207	1	370	0	646
C. mycophagus	Scaffold5560	98.66	373	5	0	18581	18953	1	373	0	700
C. chlamydosporus	Scaffold13364	98.67	75	0	1	3050	3124	1232	1305	2e-28	133
C. polyspermus	Scaffold9564	98.67	679	9	0	6186	6864	1597	919	0	1233
C. polytocus	Scaffold352	98.68	304	4	0	12030	12333	1	304	1e-160	571
C. lichenicolus	Scaffold3350	98.69	306	4	0	194	499	306	1	1e-161	575
C. polytocus	Scaffold1376	98.7	385	5	0	20319	20703	431	47	0	682
C. lichenicolus	Scaffold2873	98.72	78	1	0	15165	15242	496	419	9e-33	147
C. lichenicolus	Scaffold5288	98.72	78	1	0	29410	29487	390	313	9e-33	147
C. mycophagus	Scaffold1992	98.72	623	8	0	21439	22061	1	623	0	1130
C. taihushanensis	Scaffold2975	98.74	238	3	0	8323	8560	380	143	2e-123	448
C. mycophagus	Scaffold979	98.75	80	1	0	24598	24677	1676	1755	5e-34	151
C. taihushanensis	Scaffold3148	98.78	327	4	0	16688	17014	327	1	5e-133	480
C. mycophagus	Scaffold6768	98.8	334	3	1	12007	12340	1	333	5e-176	622
C. taihushanensis	Scaffold1253	98.81	922	11	0	42964	43885	1	922	0	1598
C. taihushanensis	Scaffold3158	98.82	338	4	0	18176	18513	338	1	0	638
C. polytocus	Scaffold1153	98.83	599	6	1	28472	29069	59	657	0	1049
C. lichenicolus	Scaffold7736	98.83	341	3	1	19936	20276	340	1	4e-180	636
C. lichenicolus	Scaffold7445	98.83	171	2	0	36922	37092	171	1	2e-73	281
C. taihushanensis	Scaffold2220	98.83	600	7	0	29136	29735	1	600	0	1092
C. polytocus	Scaffold1598	98.84	172	2	0	8402	8573	383	212	3e-72	278
C. taihushanensis	Scaffold2801	98.84	259	3	0	23485	23743	259	1	5e-136	490
C. lichenicolus	Scaffold2873	98.86	175	2	0	11847	12021	2834	2660	3e-88	331
C. mycophagus	Scaffold5096	98.89	361	4	0	10119	10479	34	394	0	642
C. polytocus	Scaffold446	98.9	638	4	1	24471	25108	599	1233	0	1172
C. taihushanensis	Scaffold1846	98.9	182	1	1	35426	35607	301	121	3e-79	301
C. polyspermus	Scaffold91	98.91	92	1	0	28467	28558	23970	23879	5e-41	174
C. taihushanensis	Scaffold1835	98.91	275	2	1	22673	22946	733	459	1e-130	472
C. polytocus	Scaffold1576	98.92	372	0	2	36973	37341	1	371	2e-174	617
C. mycophagus	Scaffold2950	98.92	646	7	0	1851	2496	674	29	0	1225
C. taihushanensis	Scaffold1845	98.92	836	9	0	34097	34932	1	836	0	1491
C. polytocus	Scaffold400	98.93	280	3	0	31132	31411	10052	10331	4e-136	490
C. taihushanensis	Scaffold1551	98.94	283	3	0	41019	41301	12	294	3e-150	537
C. mycophagus	Scaffold7565	98.95	95	1	0	1627	1721	169	75	5e-43	180
C. taihushanensis	Scaffold1709	98.97	872	9	0	4631	5502	948	77	0	1616
C. mycophagus	Scaffold2383	98.98	879	8	1	10477	11355	12	889	0	1455
C. taihushanensis	Scaffold2310	98.99	493	5	0	39713	40205	526	34	0	938
C. taihushanensis	Scaffold2675	98.99	198	2	0	11521	11718	93	290	5e-102	377
C. polytocus	Scaffold700	99	300	3	0	9541	9840	1	300	4e-148	529
C. chlamydosporus	Scaffold15988	99.01	708	6	1	3659	4366	5	711	0	1298
C. lichenicolus	Scaffold3916	99.01	202	2	0	11494	11695	973	1174	2e-104	385
C. taihushanensis	Scaffold1216	99.02	408	3	1	7175	7582	1190	784	0	722
C. taihushanensis	Scaffold1732	99.03	309	2	1	10351	10659	2	309	6e-151	539
C. chlamydosporus	Scaffold13364	99.04	104	1	0	3246	3349	1427	1530	4e-48	198
C. polytocus	Scaffold1730	99.04	312	0	1	21295	21606	1	309	1e-166	591
C. polytocus	Scaffold1835	99.04	314	1	2	7147	7459	313	1	4e-148	529
C. lichenicolus	Scaffold5913	99.05	419	4	0	9610	10028	419	1	0	704
C. lichenicolus	Scaffold4324	99.06	847	8	0	3138	3984	874	28	0	1616
C. mycophagus	Scaffold7565	99.06	106	0	1	1486	1591	309	205	4e-47	194
C. taihushanensis	Scaffold1928	99.06	106	1	0	42719	42824	126	21	2e-49	202
C. taihushanensis	Scaffold1410	99.07	321	2	1	26727	27047	1070	1389	5e-136	490
C. mycophagus	Scaffold4804	99.08	217	1	1	13149	13365	231	16	5e-111	406
C. polytocus	Scaffold1029	99.1	556	5	0	36382	36937	302	857	0	1021
C. polytocus	Scaffold814	99.12	340	3	0	19472	19811	111	450	0	650
C. mycophagus	Scaffold2174	99.12	341	2	1	6830	7170	340	1	5e-148	529
C. taihushanensis	Scaffold2055	99.15	235	1	1	28957	29191	468	701	1e-121	442
C. lichenicolus	Scaffold7995	99.19	124	0	1	2048	2171	201	323	8e-58	230
C. mycophagus	Scaffold2589	99.19	615	3	2	14782	15396	1096	484	0	1164
C. lichenicolus	Scaffold6533	99.2	250	0	2	41146	41395	171	418	2e-117	428
C. taihushanensis	Scaffold3123	99.2	251	2	0	32759	33009	350	100	1e-133	482
C. polytocus	Scaffold1643	99.21	378	0	2	27857	28233	1	376	1e-154	551
C. lichenicolus	Scaffold3350	99.22	641	4	1	41316	41956	1892	1253	0	1181
C. polyspermus	Scaffold9564	99.24	264	0	1	7055	7318	728	467	1e-121	442
C. lichenicolus	Scaffold2873	99.24	393	2	1	13027	13418	1856	1464	0	747
C. chlamydosporus	Scaffold2415	99.25	265	2	0	10525	10789	5241	4977	8e-142	509
C. taihushanensis	Scaffold2719	99.25	133	1	0	22281	22413	25	157	1e-65	256
C. mycophagus	Scaffold2018	99.26	404	3	0	25555	25958	1813	2216	0	735
C. polytocus	Scaffold1064	99.27	686	3	2	1114	1799	7	690	0	1304
C. mycophagus	Scaffold2383	99.27	409	0	3	11488	11896	1021	1426	0	763
C. taihushanensis	Scaffold2300	99.27	546	4	0	31639	32184	17	562	0	961
C. lichenicolus	Scaffold460	99.28	276	2	0	25435	25710	12022	12297	2e-148	531
C. taihushanensis	Scaffold1341	99.28	278	1	1	4222	4499	277	1	1e-136	492
C. mycophagus	Scaffold3352	99.3	142	1	0	16774	16915	580	439	5e-71	274
C. taihushanensis	Scaffold2028	99.3	716	5	0	9689	10404	1	716	0	1380
C. lichenicolus	Scaffold3350	99.31	726	1	2	41988	42713	1221	500	0	1388
C. polytocus	Scaffold1642	99.32	148	1	0	35524	35671	36	183	1e-74	285
C. chlamydosporus	Scaffold7200	99.33	451	3	0	19175	19625	451	1	0	829
C. lichenicolus	Scaffold3023	99.36	1864	11	1	38284	40147	2301	439	0	3550
C. taihushanensis	Scaffold1216	99.36	468	2	1	7899	8366	467	1	0	848
C. mycophagus	Scaffold17	99.38	322	1	1	20916	21237	11701	12021	1e-173	615
C. mycophagus	Scaffold6156	99.38	325	1	1	7965	8289	30	353	6e-163	579
C. chlamydosporus	Scaffold13364	99.39	329	2	0	3434	3762	1615	1943	5e-180	636
C. polytocus	Scaffold177	99.39	653	2	2	17126	17778	770	120	0	1178
C. lichenicolus	Scaffold3768	99.39	1301	8	0	7049	8349	2	1302	0	2343
C. taihushanensis	Scaffold1066	99.39	165	1	0	36587	36751	9	173	1e-84	319
C. chlamydosporus	Scaffold14619	99.41	678	3	1	5467	6144	1087	411	0	1263
C. polytocus	Scaffold958	99.41	170	1	0	22405	22574	85	254	8e-88	329
C. polytocus	Scaffold916	99.41	170	0	1	32975	33144	15	183	4e-71	274
C. taihushanensis	Scaffold2719	99.41	170	1	0	22448	22617	191	360	1e-87	329
C. mycophagus	Scaffold7390	99.42	171	0	1	9883	10053	58	227	6e-86	323
C. taihushanensis	Scaffold1603	99.42	172	1	0	20253	20424	469	298	7e-89	333
C. polytocus	Scaffold700	99.43	528	3	0	11223	11750	1987	2514	0	1023
C. polyspermus	Scaffold2448	99.43	529	2	1	15443	15971	763	236	0	902
C. polytocus	Scaffold224	99.44	177	1	0	14640	14816	24655	24479	5e-92	343
C. chlamydosporus	Scaffold3646	99.45	547	0	1	22263	22809	4253	3710	0	955
C. lichenicolus	Scaffold2196	99.46	557	0	2	6013	6569	3583	4136	0	954
C. mycophagus	Scaffold1992	99.46	1867	5	5	22211	24076	773	2635	0	3350
C. polytocus	Scaffold1578	99.47	187	0	1	30309	30495	251	66	5e-83	313
C. taihushanensis	Scaffold1066	99.47	752	1	1	37406	38154	828	1579	0	1455
C. taihushanensis	Scaffold1341	99.48	384	2	0	3057	3440	1441	1058	0	745
C. polytocus	Scaffold536	99.49	781	3	1	31818	32597	1	781	0	1396
C. polyspermus	Scaffold9564	99.49	394	2	0	7383	7776	401	8	0	765
C. mycophagus	Scaffold1909	99.49	195	1	0	28429	28623	1694	1500	1e-102	379
C. polytocus	Scaffold446	99.5	1210	4	2	26422	27630	1392	2600	0	2183
C. polytocus	Scaffold1777	99.51	203	0	1	13317	13519	137	338	1e-92	345
C. lichenicolus	Scaffold460	99.51	205	0	1	30945	31149	14278	14481	4e-106	391
C. mycophagus	Scaffold7868	99.52	208	1	0	26561	26768	1	208	2e-110	404
C. taihushanensis	Scaffold1341	99.52	625	2	1	3506	4130	992	369	0	1207
C. chlamydosporus	Scaffold7200	99.53	1058	4	1	16867	17924	2760	1704	0	2050
C. polytocus	Scaffold352	99.53	213	0	1	12417	12629	296	507	1e-98	365
C. polyspermus	Scaffold11386	99.53	851	0	2	4789	5638	958	111	0	1596
C. taihushanensis	Scaffold3236	99.54	216	0	1	28172	28387	107	321	3e-100	371
C. mycophagus	Scaffold4291	99.56	229	0	1	2646	2874	386	159	8e-110	402
C. polytocus	Scaffold1212	99.57	233	0	1	29651	29882	233	1	3e-96	357
C. taihushanensis	Scaffold1059	99.57	690	1	2	47729	48417	1757	2445	0	1281
C. taihushanensis	Scaffold2053	99.58	479	2	0	5936	6414	479	1	0	934
C. mycophagus	Scaffold2227	99.59	1475	2	4	29264	30735	324	1797	0	2613
C. taihushanensis	Scaffold1551	99.59	726	2	1	41441	42165	434	1159	0	1348
C. chlamydosporus	Scaffold7200	99.6	753	3	0	18231	18983	1396	644	0	1469
C. chlamydosporus	Scaffold3646	99.63	814	3	0	20338	21151	6180	5367	0	1513
C. mycophagus	Scaffold2619	99.64	281	0	1	13685	13965	887	608	1e-151	541
C. chlamydosporus	Scaffold6402	99.65	2536	5	4	26429	28963	19	2551	0	4841
C. mycophagus	Scaffold1909	99.65	289	1	0	28077	28365	2046	1758	9e-159	565
C. taihushanensis	Scaffold1216	99.65	289	1	0	6823	7111	1542	1254	1e-158	565
C. taihushanensis	Scaffold1429	99.65	285	0	1	31177	31461	560	277	7e-154	549
C. taihushanensis	Scaffold2055	99.65	283	1	0	28579	28861	91	373	4e-155	553
C. polytocus	Scaffold700	99.66	580	1	1	10570	11149	1335	1913	0	1126
C. polyspermus	Scaffold4178	99.67	302	1	0	25320	25621	2391	2692	2e-166	591
C. taihushanensis	Scaffold1066	99.67	901	1	2	24596	25495	1933	2832	0	1562
C. taihushanensis	Scaffold1748	99.67	301	0	1	13263	13562	939	639	1e-136	492
C. mycophagus	Scaffold17	99.69	327	1	0	19933	20259	10534	10860	0	640
C. taihushanensis	Scaffold1253	99.69	957	0	3	43963	44919	1000	1953	0	1802
C. polytocus	Scaffold446	99.7	332	1	0	24076	24407	204	535	2e-159	567
C. taihushanensis	Scaffold1429	99.7	330	0	1	30782	31111	954	626	0	638
C. chlamydosporus	Scaffold21366	99.71	691	2	0	6567	7257	691	1	0	1354
C. polytocus	Scaffold946	99.71	339	0	1	39985	40323	531	868	0	656
C. chlamydosporus	Scaffold2415	99.72	354	0	1	8809	9162	6957	6605	1e-153	549
C. polyspermus	Scaffold6785	99.73	1119	1	2	10226	11344	1506	390	0	2179
C. chlamydosporus	Scaffold2415	99.74	384	0	1	11853	12235	3912	3529	0	686
C. chlamydosporus	Scaffold3646	99.76	1693	2	2	22871	24562	3651	1960	0	3213
C. polytocus	Scaffold536	99.76	417	1	0	34264	34680	4582	4998	0	819
C. polyspermus	Scaffold2234	99.77	431	0	1	28467	28897	8692	8263	0	839
C. taihushanensis	Scaffold1563	99.78	451	1	0	45519	45969	658	1108	0	886
C. polytocus	Scaffold363	99.79	477	0	1	42031	42507	13190	13665	0	930
C. polytocus	Scaffold224	99.79	480	1	0	14961	15440	24391	23912	0	944
C. polyspermus	Scaffold9584	99.79	956	0	2	17801	18755	444	1398	0	1768
C. lichenicolus	Scaffold3024	99.79	482	1	0	34681	35162	1942	2423	0	948
C. chlamydosporus	Scaffold2415	99.81	1040	0	2	13750	14789	2016	979	0	2030
C. chlamydosporus	Scaffold2415	99.81	527	0	1	11004	11529	4762	4236	0	910
C. lichenicolus	Scaffold3024	99.81	1554	2	1	33050	34603	313	1865	0	2966
C. mycophagus	Scaffold1730	99.82	570	0	1	31649	32218	3780	3212	0	1031
C. mycophagus	Scaffold17	99.83	596	0	1	18110	18704	6682	7277	0	1118
C. chlamydosporus	Scaffold2415	99.84	1213	0	2	12460	13672	3304	2094	0	2296
C. mycophagus	Scaffold17	99.84	637	0	1	17336	17972	5910	6545	0	1158
C. polyspermus	Scaffold6785	99.85	672	0	1	9493	10164	2238	1568	0	1233
C. polyspermus	Scaffold7172	99.85	678	0	1	3910	4587	2056	1380	0	1203
C. taihushanensis	Scaffold1059	99.85	687	1	0	46153	46839	180	866	0	1312
C. polyspermus	Scaffold5938	99.86	693	0	1	12107	12799	3447	2756	0	1358
C. polytocus	Scaffold994	99.87	778	1	0	8826	9603	75	852	0	1481
C. taihushanensis	Scaffold1059	99.87	752	0	1	46880	47630	907	1658	0	1279
C. polyspermus	Scaffold5245	99.89	952	0	1	22391	23342	2682	1732	0	1871
C. polyspermus	Scaffold8562	99.91	1110	0	1	1455	2564	1747	639	0	2185
C. polyspermus	Scaffold4178	99.93	1334	0	1	26350	27683	3146	4478	0	2522
C. chlamydosporus	Scaffold6402	100	658	0	0	388	1045	3230	3887	0	1263
C. chlamydosporus	Scaffold6402	100	96	0	0	1150	1245	3991	4086	1e-45	190
C. chlamydosporus	Scaffold6402	100	95	0	0	164	258	3006	3100	4e-45	188
C. chlamydosporus	Scaffold6402	100	57	0	0	1	57	2843	2899	2e-22	113
C. chlamydosporus	Scaffold6402	100	40	0	0	29047	29086	2636	2675	3e-12	79.8
C. chlamydosporus	Scaffold6402	100	40	0	0	1316	1355	4157	4196	3e-12	79.8
C. chlamydosporus	Scaffold6402	100	33	0	0	29221	29253	2810	2842	4e-08	65.9
C. chlamydosporus	Scaffold3646	100	297	0	0	21375	21671	5143	4847	1e-165	589
C. chlamydosporus	Scaffold3646	100	236	0	0	26254	26489	266	31	1e-116	426
C. chlamydosporus	Scaffold3646	100	166	0	0	25301	25466	1220	1055	2e-87	329
C. chlamydosporus	Scaffold3646	100	141	0	0	24958	25098	1564	1424	3e-58	232
C. chlamydosporus	Scaffold3646	100	100	0	0	21211	21310	5307	5208	4e-48	198
C. chlamydosporus	Scaffold3646	100	76	0	0	25879	25954	642	567	9e-34	151
C. chlamydosporus	Scaffold3646	100	73	0	0	26019	26091	502	430	5e-32	145
C. chlamydosporus	Scaffold3646	100	69	0	0	25527	25595	995	927	1e-29	137
C. chlamydosporus	Scaffold3646	100	59	0	0	20144	20202	6374	6316	1e-23	117
C. chlamydosporus	Scaffold3646	100	48	0	0	25213	25260	1308	1261	4e-17	95.6
C. chlamydosporus	Scaffold3646	100	40	0	0	26158	26197	363	324	3e-12	79.8
C. chlamydosporus	Scaffold3646	100	38	0	0	24774	24811	1748	1711	4e-11	75.8
C. chlamydosporus	Scaffold3646	100	34	0	0	25150	25183	1372	1339	1e-08	67.9
C. chlamydosporus	Scaffold3646	100	31	0	0	25150	25180	1294	1264	6e-07	61.9
C. chlamydosporus	Scaffold2415	100	486	0	0	9192	9677	6575	6090	0	922
C. chlamydosporus	Scaffold2415	100	301	0	0	10165	10465	5601	5301	5e-168	597
C. chlamydosporus	Scaffold2415	100	237	0	0	9879	10115	5888	5652	2e-117	428
C. chlamydosporus	Scaffold2415	100	133	0	0	11634	11766	4131	3999	8e-68	264
C. chlamydosporus	Scaffold2415	100	107	0	0	7484	7590	8282	8176	3e-52	212
C. chlamydosporus	Scaffold2415	100	85	0	0	8536	8620	7229	7145	4e-39	168
C. chlamydosporus	Scaffold2415	100	65	0	0	8285	8349	7480	7416	3e-27	129
C. chlamydosporus	Scaffold2415	100	47	0	0	8093	8139	7673	7627	2e-16	93.7
C. chlamydosporus	Scaffold7200	100	514	0	0	15866	16379	3760	3247	0	977
C. chlamydosporus	Scaffold7200	100	210	0	0	16520	16729	3107	2898	9e-114	416
C. chlamydosporus	Scaffold15988	100	236	0	0	4778	5013	1123	1358	3e-129	468
C. chlamydosporus	Scaffold15988	100	171	0	0	4542	4712	887	1057	2e-90	339
C. chlamydosporus	Scaffold15988	100	40	0	0	4432	4471	777	816	3e-12	79.8
C. chlamydosporus	Scaffold14619	100	216	0	0	6275	6490	280	65	2e-117	428
C. chlamydosporus	Scaffold14619	100	37	0	0	6175	6211	380	344	2e-10	73.8
C. chlamydosporus	Scaffold13364	100	331	0	0	2679	3009	861	1191	2e-173	615
C. chlamydosporus	Scaffold32852	100	34	0	0	1156	1189	34	1	1e-08	67.9
C. polytocus	Scaffold446	100	64	0	0	27687	27750	2657	2720	6e-27	127
C. polytocus	Scaffold363	100	118	0	0	41708	41825	12769	12886	3e-59	234
C. polytocus	Scaffold363	100	41	0	0	41998	42038	13133	13173	3e-13	81.8
C. polytocus	Scaffold363	100	37	0	0	41816	41852	12917	12953	8e-11	73.8
C. polytocus	Scaffold177	100	152	0	0	16982	17133	962	811	3e-47	194
C. polytocus	Scaffold224	100	78	0	0	15491	15568	23861	23784	3e-35	155
C. polytocus	Scaffold392	100	321	0	0	1	321	532	852	2e-180	636
C. polytocus	Scaffold392	100	206	0	0	800	1005	1259	1464	1e-111	408
C. polytocus	Scaffold392	100	65	0	0	1114	1178	1490	1554	1e-27	129
C. polytocus	Scaffold392	100	49	0	0	405	453	936	984	5e-18	97.6
C. polytocus	Scaffold945	100	319	0	0	18986	19304	597	279	4e-179	632
C. polytocus	Scaffold945	100	43	0	0	19359	19401	224	182	2e-14	85.7
C. polytocus	Scaffold814	100	377	0	0	19811	20187	1327	1703	0	747
C. polytocus	Scaffold653	100	346	0	0	21590	21935	2592	2937	0	686
C. polytocus	Scaffold653	100	71	0	0	21011	21081	233	303	4e-31	141
C. polytocus	Scaffold946	100	77	0	0	40354	40430	899	975	1e-34	153
C. polytocus	Scaffold946	100	49	0	0	39455	39503	1	49	5e-18	97.6
C. polytocus	Scaffold958	100	289	0	0	22927	23215	607	895	3e-161	573
C. polytocus	Scaffold958	100	85	0	0	23279	23363	956	1040	6e-27	127
C. polytocus	Scaffold352	100	121	0	0	12687	12807	565	685	6e-61	240
C. polytocus	Scaffold882	100	255	0	0	4352	4606	577	831	6e-141	506
C. polytocus	Scaffold882	100	205	0	0	3856	4060	80	284	4e-111	406
C. polytocus	Scaffold882	100	156	0	0	4128	4283	353	508	7e-82	309
C. polytocus	Scaffold882	100	102	0	0	4994	5095	1220	1321	1e-49	202
C. polytocus	Scaffold882	100	37	0	0	4760	4796	986	1022	8e-11	73.8
C. polytocus	Scaffold882	100	30	0	0	5139	5168	1311	1340	1e-06	60
C. polytocus	Scaffold400	100	167	0	0	5270	5436	248	82	2e-88	331
C. polytocus	Scaffold400	100	87	0	0	31573	31659	10493	10579	1e-40	172
C. polytocus	Scaffold916	100	182	0	0	33198	33379	237	418	2e-97	361
C. polytocus	Scaffold916	100	112	0	0	33692	33803	730	841	1e-55	222
C. polytocus	Scaffold916	100	64	0	0	33527	33590	565	628	6e-27	127
C. polytocus	Scaffold1782	100	211	0	0	42573	42783	125	335	1e-114	418
C. polytocus	Scaffold1881	100	199	0	0	30974	31172	102	300	2e-107	394
C. polytocus	Scaffold1707	100	175	0	0	42962	43136	187	361	3e-93	347
C. polytocus	Scaffold1058	100	170	0	0	2527	2696	170	1	3e-90	337
C. polytocus	Scaffold1058	100	192	0	0	2044	2235	653	462	2e-76	291
C. polytocus	Scaffold1058	100	90	0	0	2318	2407	379	290	2e-42	178
C. polytocus	Scaffold1578	100	34	0	0	33198	33231	35	2	5e-09	67.9
C. polytocus	Scaffold1209	100	98	0	0	38314	38411	219	316	3e-47	194
C. polytocus	Scaffold1209	100	42	0	0	38112	38153	17	58	8e-14	83.8
C. polytocus	Scaffold1349	100	78	0	0	7932	8009	256	333	3e-35	155
C. polytocus	Scaffold1633	100	119	0	0	3639	3757	196	78	9e-60	236
C. polytocus	Scaffold1773	100	105	0	0	30129	30233	178	74	2e-51	208
C. polytocus	Scaffold1850	100	64	0	0	3132	3195	307	244	6e-27	127
C. polytocus	Scaffold1510	100	64	0	0	5032	5095	1	64	6e-27	127
C. polytocus	Scaffold1510	100	30	0	0	5139	5168	54	83	1e-06	60
C. polytocus	Scaffold294	100	64	0	0	5032	5095	91	28	6e-27	127
C. polytocus	Scaffold294	100	30	0	0	5139	5168	38	9	1e-06	60
C. polytocus	Scaffold1425	100	30	0	0	40626	40655	264	293	1e-06	60
C. polyspermus	Scaffold2234	100	2146	0	0	28971	31116	8190	6045	0	4212
C. polyspermus	Scaffold2234	100	1163	0	0	31178	32340	5984	4822	0	2305
C. polyspermus	Scaffold2234	100	448	0	0	1	448	4261	3814	0	888
C. polyspermus	Scaffold2234	100	366	0	0	32535	32900	4627	4262	0	726
C. polyspermus	Scaffold2234	100	244	0	0	528	771	3734	3491	1e-121	442
C. polyspermus	Scaffold2234	100	46	0	0	32412	32457	4750	4705	6e-16	91.7
C. polyspermus	Scaffold2234	100	37	0	0	1352	1388	6245	6209	1e-10	73.8
C. polyspermus	Scaffold2234	100	35	0	0	1351	1385	6194	6160	2e-09	69.9
C. polyspermus	Scaffold2234	100	30	0	0	25585	25614	6238	6209	2e-06	60
C. polyspermus	Scaffold2234	100	29	0	0	25970	25998	6132	6104	8e-06	58
C. polyspermus	Scaffold2234	100	29	0	0	25956	25984	6132	6104	8e-06	58
C. polyspermus	Scaffold2234	100	29	0	0	25942	25970	6132	6104	8e-06	58
C. polyspermus	Scaffold4178	100	680	0	0	27744	28423	4539	5218	0	1348
C. polyspermus	Scaffold4178	100	411	0	0	25860	26270	2656	3066	0	767
C. polyspermus	Scaffold4178	100	78	0	0	25083	25160	2154	2231	5e-35	155
C. polyspermus	Scaffold4178	100	51	0	0	25808	25858	2656	2706	6e-19	101
C. polyspermus	Scaffold4178	100	37	0	0	25770	25806	2670	2706	1e-10	73.8
C. polyspermus	Scaffold4178	100	30	0	0	1359	1388	2656	2685	2e-06	60
C. polyspermus	Scaffold4178	100	29	0	0	31029	31057	2738	2766	8e-06	58
C. polyspermus	Scaffold4178	100	29	0	0	31029	31057	2752	2780	8e-06	58
C. polyspermus	Scaffold4178	100	29	0	0	31029	31057	2766	2794	8e-06	58
C. polyspermus	Scaffold8562	100	120	0	0	25770	25889	1933	1814	4e-60	238
C. polyspermus	Scaffold8562	100	103	0	0	25808	25910	1947	1845	6e-50	204
C. polyspermus	Scaffold8562	100	62	0	0	1353	1414	1849	1788	2e-25	123
C. polyspermus	Scaffold8562	100	36	0	0	30917	30952	1849	1814	5e-10	71.9
C. polyspermus	Scaffold8562	100	36	0	0	1353	1388	1901	1866	5e-10	71.9
C. polyspermus	Scaffold8562	100	30	0	0	25585	25614	1843	1814	2e-06	60
C. polyspermus	Scaffold8562	100	30	0	0	1359	1388	1947	1918	2e-06	60
C. polyspermus	Scaffold6785	100	348	0	0	9100	9447	2632	2285	0	690
C. polyspermus	Scaffold6785	100	270	0	0	8773	9042	2959	2690	1e-149	535
C. polyspermus	Scaffold6785	100	69	0	0	11627	11695	107	39	1e-29	137
C. polyspermus	Scaffold5245	100	622	0	0	23512	24133	1563	942	0	1233
C. polyspermus	Scaffold5245	100	317	0	0	24193	24509	882	566	1e-177	628
C. polyspermus	Scaffold5245	100	298	0	0	21430	21727	3644	3347	2e-166	591
C. polyspermus	Scaffold5245	100	175	0	0	22115	22289	2958	2784	6e-93	347
C. polyspermus	Scaffold5245	100	73	0	0	21219	21291	3855	3783	5e-32	145
C. polyspermus	Scaffold5245	100	38	0	0	21880	21917	3193	3156	3e-11	75.8
C. polyspermus	Scaffold5245	100	36	0	0	23450	23485	1625	1590	5e-10	71.9
C. polyspermus	Scaffold9584	100	350	0	0	17386	17735	29	378	0	694
C. polyspermus	Scaffold9584	100	126	0	0	18820	18945	1463	1588	1e-63	250
C. polyspermus	Scaffold7172	100	289	0	0	3558	3846	2405	2117	6e-161	573
C. polyspermus	Scaffold9564	100	64	0	0	6921	6984	862	799	1e-26	127
C. polyspermus	Scaffold2448	100	70	0	0	16001	16070	205	136	3e-30	139
C. polyspermus	Scaffold2448	100	43	0	0	16163	16205	43	1	4e-14	85.7
C. polyspermus	Scaffold12327	100	279	0	0	13097	13375	872	594	5e-155	553
C. polyspermus	Scaffold12327	100	246	0	0	13508	13753	461	216	3e-135	488
C. polyspermus	Scaffold12327	100	174	0	0	13014	13187	174	1	2e-92	345
C. polyspermus	Scaffold381	100	221	0	0	17100	17320	16047	16267	2e-120	438
C. polyspermus	Scaffold381	100	63	0	0	17386	17448	16288	16350	4e-26	125
C. polyspermus	Scaffold88	100	179	0	0	8685	8863	20538	20360	3e-95	355
C. polyspermus	Scaffold13887	100	168	0	0	14044	14211	303	136	9e-89	333
C. polyspermus	Scaffold91	100	94	0	0	28333	28426	24055	23962	1e-44	186
C. polyspermus	Scaffold18702	100	65	0	0	14563	14627	166	102	3e-27	129
C. polyspermus	Scaffold18817	100	46	0	0	15018	15063	119	164	6e-16	91.7
C. polyspermus	Scaffold18730	100	32	0	0	14412	14443	127	158	1e-07	63.9
C. lichenicolus	Scaffold3023	100	132	0	0	38008	38139	2577	2446	2e-67	262
C. lichenicolus	Scaffold3350	100	89	0	0	1	89	499	411	1e-41	176
C. lichenicolus	Scaffold460	100	666	0	0	26975	27640	12557	13222	0	1320
C. lichenicolus	Scaffold460	100	298	0	0	28009	28306	13212	13509	2e-166	591
C. lichenicolus	Scaffold460	100	219	0	0	28598	28816	13507	13725	3e-119	434
C. lichenicolus	Scaffold460	100	154	0	0	26052	26205	12330	12483	2e-80	305
C. lichenicolus	Scaffold460	100	108	0	0	29193	29300	13800	13907	5e-53	214
C. lichenicolus	Scaffold460	100	74	0	0	30163	30236	14125	14198	9e-33	147
C. lichenicolus	Scaffold460	100	65	0	0	29890	29954	13948	14012	2e-27	129
C. lichenicolus	Scaffold460	100	61	0	0	30049	30109	14035	14095	5e-25	121
C. lichenicolus	Scaffold460	100	53	0	0	28865	28917	13720	13772	3e-20	105
C. lichenicolus	Scaffold460	100	49	0	0	31431	31479	14485	14533	8e-18	97.6
C. lichenicolus	Scaffold460	100	46	0	0	30280	30325	14194	14239	5e-16	91.7
C. lichenicolus	Scaffold460	100	37	0	0	29047	29083	13769	13805	1e-10	73.8
C. lichenicolus	Scaffold460	100	37	0	0	30736	30772	14233	14269	1e-10	73.8
C. lichenicolus	Scaffold2873	100	621	0	0	12333	12953	2550	1930	0	1231
C. lichenicolus	Scaffold2873	100	209	0	0	13501	13709	1415	1207	9e-101	373
C. lichenicolus	Scaffold2873	100	162	0	0	14419	14580	929	768	3e-85	321
C. lichenicolus	Scaffold2873	100	149	0	0	14813	14961	698	550	2e-77	295
C. lichenicolus	Scaffold2873	100	136	0	0	13933	14068	1103	968	9e-70	270
C. lichenicolus	Scaffold2873	100	120	0	0	12170	12289	2665	2546	3e-60	238
C. lichenicolus	Scaffold2873	100	85	0	0	14673	14757	775	691	3e-39	168
C. lichenicolus	Scaffold2873	100	75	0	0	15022	15096	555	481	2e-33	149
C. lichenicolus	Scaffold2873	100	41	0	0	13779	13819	1137	1097	5e-13	81.8
C. lichenicolus	Scaffold3913	100	245	0	0	24383	24627	613	369	8e-135	486
C. lichenicolus	Scaffold3913	100	144	0	0	37608	37751	344	201	2e-74	285
C. lichenicolus	Scaffold3913	100	123	0	0	37896	38018	146	24	2e-49	202
C. lichenicolus	Scaffold2196	100	144	0	0	6742	6885	4234	4377	2e-74	285
C. lichenicolus	Scaffold2196	100	68	0	0	7087	7154	4369	4436	4e-29	135
C. lichenicolus	Scaffold2196	100	39	0	0	6636	6674	4203	4241	7e-12	77.8
C. lichenicolus	Scaffold6436	100	371	0	0	5200	5570	371	1	0	694
C. lichenicolus	Scaffold3754	100	345	0	0	21542	21886	207	551	0	684
C. lichenicolus	Scaffold3754	100	173	0	0	22113	22285	778	950	8e-92	343
C. lichenicolus	Scaffold3754	100	131	0	0	21952	22082	617	747	9e-67	260
C. lichenicolus	Scaffold4060	100	326	0	0	1425	1750	725	1050	0	646
C. lichenicolus	Scaffold4060	100	289	0	0	1073	1361	373	661	5e-161	573
C. lichenicolus	Scaffold2817	100	283	0	0	2775	3057	2244	1962	2e-157	561
C. lichenicolus	Scaffold2817	100	252	0	0	2462	2713	2554	2303	6e-139	500
C. lichenicolus	Scaffold2817	100	204	0	0	3884	4087	1825	1622	2e-110	404
C. lichenicolus	Scaffold2817	100	165	0	0	5074	5238	1428	1264	5e-87	327
C. lichenicolus	Scaffold2817	100	110	0	0	40914	41023	2979	2870	3e-54	218
C. lichenicolus	Scaffold2817	100	114	0	0	3095	3208	1969	1856	4e-44	184
C. lichenicolus	Scaffold2817	100	91	0	0	4542	4632	1544	1454	7e-43	180
C. lichenicolus	Scaffold2817	100	80	0	0	2270	2349	2746	2667	2e-36	159
C. lichenicolus	Scaffold2817	100	73	0	0	4370	4442	2877	2805	4e-32	145
C. lichenicolus	Scaffold2817	100	61	0	0	4309	4369	1631	1571	5e-25	121
C. lichenicolus	Scaffold2817	100	47	0	0	3227	3273	1864	1818	1e-16	93.7
C. lichenicolus	Scaffold2817	100	42	0	0	4876	4917	1461	1420	1e-13	83.8
C. lichenicolus	Scaffold2817	100	38	0	0	4404	4441	1574	1537	3e-11	75.8
C. lichenicolus	Scaffold2817	100	35	0	0	5363	5397	1259	1225	2e-09	69.9
C. lichenicolus	Scaffold2848	100	44	0	0	22988	23031	2564	2521	7e-15	87.7
C. lichenicolus	Scaffold6533	100	44	0	0	41038	41081	63	106	7e-15	87.7
C. lichenicolus	Scaffold8048	100	210	0	0	16207	16416	112	321	6e-114	416
C. lichenicolus	Scaffold3916	100	92	0	0	11274	11365	753	844	2e-43	182
C. lichenicolus	Scaffold3520	100	175	0	0	26700	26874	1048	874	5e-93	347
C. lichenicolus	Scaffold3520	100	74	0	0	19062	19135	74	1	3e-20	105
C. lichenicolus	Scaffold8419	100	33	0	0	23720	23752	271	303	3e-08	65.9
C. lichenicolus	Scaffold7782	100	47	0	0	4542	4588	85	131	1e-16	93.7
C. mycophagus	Scaffold17	100	283	0	0	19653	19935	9496	9778	1e-157	561
C. mycophagus	Scaffold17	100	152	0	0	20629	20780	11558	11709	2e-79	301
C. mycophagus	Scaffold979	100	508	0	0	24808	25315	1742	2249	0	1007
C. mycophagus	Scaffold1909	100	470	0	0	27263	27732	2860	2391	0	932
C. mycophagus	Scaffold1909	100	266	0	0	28691	28956	337	72	2e-147	527
C. mycophagus	Scaffold1909	100	86	0	0	30650	30735	91	6	5e-40	170
C. mycophagus	Scaffold2765	100	397	0	0	18930	19326	78	474	0	745
C. mycophagus	Scaffold2018	100	217	0	0	25953	26169	2252	2468	4e-118	430
C. mycophagus	Scaffold2018	100	42	0	0	25480	25521	1780	1821	1e-13	83.8
C. mycophagus	Scaffold2619	100	38	0	0	14117	14154	455	418	2e-11	75.8
C. mycophagus	Scaffold2174	100	65	0	0	5950	6014	1219	1155	2e-27	129
C. mycophagus	Scaffold7868	100	106	0	0	26546	26651	196	301	6e-52	210
C. mycophagus	Scaffold4291	100	78	0	0	2914	2991	119	42	3e-35	155
C. mycophagus	Scaffold4699	100	187	0	0	26907	27093	370	184	3e-100	371
C. mycophagus	Scaffold4699	100	52	0	0	27366	27417	415	364	1e-19	103
C. mycophagus	Scaffold4699	100	45	0	0	27198	27242	79	35	2e-15	89.7
C. mycophagus	Scaffold3072	100	80	0	0	12551	12630	452	373	2e-36	159
C. mycophagus	Scaffold4418	100	43	0	0	2832	2874	299	257	2e-14	85.7
C. mycophagus	Scaffold7296	100	147	0	0	7136	7282	287	141	2e-76	291
C. mycophagus	Scaffold7296	100	70	0	0	7312	7381	110	41	2e-30	139
C. mycophagus	Scaffold3352	100	78	0	0	17038	17115	316	239	3e-35	155
C. mycophagus	Scaffold4733	100	112	0	0	1068	1179	62	173	2e-55	222
C. taihushanensis	Scaffold1066	100	175	0	0	37131	37305	554	728	5e-93	347
C. taihushanensis	Scaffold1066	100	55	0	0	36879	36933	302	356	2e-21	109
C. taihushanensis	Scaffold1059	100	212	0	0	229	440	2674	2885	4e-115	420
C. taihushanensis	Scaffold1059	100	76	0	0	1	76	2446	2521	6e-34	151
C. taihushanensis	Scaffold1216	100	70	0	0	7771	7840	595	526	2e-30	139
C. taihushanensis	Scaffold1429	100	137	0	0	31514	31650	223	87	2e-70	272
C. taihushanensis	Scaffold1799	100	85	0	0	19248	19332	412	496	2e-39	168
C. taihushanensis	Scaffold1799	100	41	0	0	19685	19725	848	888	4e-13	81.8
C. taihushanensis	Scaffold1887	100	113	0	0	15426	15538	348	236	5e-56	224
C. taihushanensis	Scaffold1748	100	105	0	0	13713	13817	488	384	3e-51	208
C. taihushanensis	Scaffold1410	100	65	0	0	25847	25911	193	257	2e-27	129
C. taihushanensis	Scaffold1410	100	48	0	0	26300	26347	643	690	3e-17	95.6
C. taihushanensis	Scaffold1410	100	33	0	0	27051	27083	1434	1466	3e-08	65.9
C. taihushanensis	Scaffold1410	100	30	0	0	26514	26543	857	886	2e-06	60
C. taihushanensis	Scaffold1835	100	244	0	0	23010	23253	395	152	1e-121	442
C. taihushanensis	Scaffold1835	100	93	0	0	23313	23405	93	1	4e-44	184
C. taihushanensis	Scaffold3254	100	50	0	0	14717	14766	50	1	2e-18	99.6
C. taihushanensis	Scaffold1603	100	112	0	0	20072	20183	650	539	2e-55	222
C. taihushanensis	Scaffold1603	100	65	0	0	19907	19971	809	745	2e-27	129
C. taihushanensis	Scaffold1846	100	80	0	0	35182	35261	545	466	2e-36	159
C. taihushanensis	Scaffold1846	100	54	0	0	35674	35727	54	1	8e-21	107
C. taihushanensis	Scaffold3313	100	100	0	0	13265	13364	1	100	6e-34	151
C. taihushanensis	Scaffold2713	100	139	0	0	14318	14456	279	417	1e-71	276
C. taihushanensis	Scaffold2864	100	70	0	0	27168	27237	180	111	2e-30	139
C. taihushanensis	Scaffold3203	100	72	0	0	25676	25747	257	328	1e-31	143
Neoconidiobolus thromboides	Scaffold1	89.53	172	18	0	3534	3705	30352	30523	2e-51	198
Neoconidiobolus thromboides	Scaffold1	98.13	107	2	0	9661	9767	17123	17229	7e-51	196
Neoconidiobolus thromboides	Scaffold1	98.8	83	1	0	17147	17229	9685	9767	6e-39	157
Neoconidiobolus thromboides	Scaffold1	90.16	122	12	0	30352	30473	3534	3655	6e-36	147
Neoconidiobolus thromboides	Scaffold1	95.12	82	4	0	14454	14535	24961	25042	4e-31	131
Neoconidiobolus thromboides	Scaffold1	98.48	66	1	0	8792	8857	17123	17188	9e-29	123
Neoconidiobolus thromboides	Scaffold1	98.44	64	1	0	24961	25024	14454	14517	1e-27	119
Neoconidiobolus thromboides	Scaffold1	91.78	73	6	0	4610	4682	10649	10721	5e-21	97.6
Neoconidiobolus thromboides	Scaffold1	100	42	0	0	17147	17188	8816	8857	8e-17	83.8
Neoconidiobolus thromboides	Scaffold1	90.16	61	6	0	10649	10709	4610	4670	7e-14	73.8
Neoconidiobolus thromboides	Scaffold1	90.74	54	5	0	7004	7057	5792	5845	4e-12	67.9
Neoconidiobolus thromboides	Scaffold1	90.74	54	5	0	5792	5845	7004	7057	4e-12	67.9
Neoconidiobolus thromboides	Scaffold1	86.44	59	8	0	15534	15592	12569	12627	7e-08	54
Neoconidiobolus thromboides	Scaffold1	86.44	59	8	0	12569	12627	15534	15592	7e-08	54
Neoconidiobolus thromboides	Scaffold1	94.29	35	2	0	26651	26685	16054	16088	7e-08	54
Neoconidiobolus thromboides	Scaffold1	100	26	0	0	20583	20608	5820	5845	3e-07	52
Neoconidiobolus thromboides	Scaffold1	100	26	0	0	5820	5845	20583	20608	3e-07	52
Neoconidiobolus thromboides	Scaffold1	88.68	53	5	1	12186	12237	2843	2895	1e-06	50.1
Neoconidiobolus thromboides	Scaffold1	88.68	53	5	1	2843	2895	12186	12237	1e-06	50.1
Neoconidiobolus thromboides	Scaffold1	100	25	0	0	12630	12654	13482	13506	1e-06	50.1
Microconidiobolus nodosus	Scaffold1	97.78	45	1	0	31385	31429	15046	15090	2e-16	81.8
Microconidiobolus nodosus	Scaffold1	97.78	45	1	0	15046	15090	31385	31429	2e-16	81.8
Microconidiobolus nodosus	Scaffold1	100	32	0	0	22149	22180	23094	23125	6e-11	63.9
Microconidiobolus nodosus	Scaffold1	96.88	32	1	0	28428	28459	25029	25060	1e-08	56
Microconidiobolus nodosus	Scaffold1	96.88	32	1	0	25029	25060	28428	28459	1e-08	56
Microconidiobolus nodosus	Scaffold1	96.77	31	1	0	28744	28774	27608	27638	5e-08	54
Microconidiobolus nodosus	Scaffold1	96.77	31	1	0	27608	27638	28744	28774	5e-08	54
Microconidiobolus nodosus	Scaffold1	91.89	37	3	0	22713	22749	30461	30497	9e-07	50.1
Microconidiobolus nodosus	Scaffold1	96.43	28	1	0	27294	27321	25034	25061	3e-06	48.1
Microconidiobolus nodosus	Scaffold1	96.43	28	1	0	25034	25061	27294	27321	3e-06	48.1
Capillidium heterosporum	Scaffold11	100	23	0	0	11311	11333	1160560	1160582	0.021	46.1
Capillidium heterosporum	Scaffold11	100	21	0	0	17017	17037	65546	65566	0.33	42.1
Capillidium heterosporum	Scaffold11	95.83	24	1	0	50738	50761	125964	125987	1.3	40.1
Capillidium heterosporum	Scaffold11	100	20	0	0	7322	7341	432688	432669	1.3	40.1
Capillidium heterosporum	Scaffold11	100	20	0	0	28075	28094	635870	635851	1.3	40.1
Capillidium heterosporum	Scaffold11	95.65	23	1	0	5877	5899	453574	453552	5.2	38.2
Capillidium heterosporum	Scaffold11	100	19	0	0	41625	41643	978929	978947	5.2	38.2
Capillidium heterosporum	Scaffold11	100	19	0	0	36153	36171	998353	998371	5.2	38.2
Capillidium heterosporum	Scaffold11	100	19	0	0	28087	28105	1253281	1253263	5.2	38.2
Capillidium heterosporum	Scaffold11	92.59	27	2	0	10586	10612	1369925	1369951	5.2	38.2
Capillidium heterosporum	Scaffold20	100	22	0	0	30622	30643	33506	33527	0.084	44.1
Capillidium heterosporum	Scaffold17	100	22	0	0	30622	30643	77382	77403	0.084	44.1
Capillidium heterosporum	Scaffold14	96.15	26	1	0	34999	35024	556399	556374	0.084	44.1
Capillidium heterosporum	Scaffold14	100	20	0	0	7107	7126	183686	183667	1.3	40.1
Capillidium heterosporum	Scaffold14	100	20	0	0	29550	29569	830982	831001	1.3	40.1
Capillidium heterosporum	Scaffold14	100	19	0	0	41199	41217	39480	39462	5.2	38.2
Capillidium heterosporum	Scaffold14	100	19	0	0	36136	36154	785856	785874	5.2	38.2
Capillidium heterosporum	Scaffold14	95.65	23	1	0	37130	37152	864664	864642	5.2	38.2
Capillidium heterosporum	Scaffold14	95.65	23	1	0	43631	43653	926157	926135	5.2	38.2
Capillidium heterosporum	Scaffold14	100	19	0	0	42016	42034	963509	963491	5.2	38.2
Capillidium heterosporum	Scaffold14	95.65	23	1	0	40233	40255	1052513	1052491	5.2	38.2
Capillidium heterosporum	Scaffold9	93.33	30	2	0	21496	21525	1224129	1224158	0.084	44.1
Capillidium heterosporum	Scaffold9	95.83	24	1	0	2424	2447	1511413	1511436	1.3	40.1
Capillidium heterosporum	Scaffold9	100	19	0	0	34812	34830	544574	544592	5.2	38.2
Capillidium heterosporum	Scaffold9	100	19	0	0	7515	7533	569989	569971	5.2	38.2
Capillidium heterosporum	Scaffold9	100	19	0	0	33759	33777	897195	897177	5.2	38.2
Capillidium heterosporum	Scaffold9	100	19	0	0	40591	40609	998942	998960	5.2	38.2
Capillidium heterosporum	Scaffold9	100	19	0	0	43890	43908	1123268	1123286	5.2	38.2
Capillidium heterosporum	Scaffold9	90.32	31	3	0	45543	45573	1510279	1510249	5.2	38.2
Capillidium heterosporum	Scaffold9	100	19	0	0	44263	44281	1510633	1510651	5.2	38.2
Capillidium heterosporum	Scaffold9	100	19	0	0	49120	49138	1512295	1512313	5.2	38.2
Capillidium heterosporum	Scaffold9	95.65	23	1	0	37130	37152	1536037	1536015	5.2	38.2
Capillidium heterosporum	Scaffold2	96.15	26	1	0	24477	24502	299186	299211	0.084	44.1
Capillidium heterosporum	Scaffold2	100	22	0	0	8053	8074	2584634	2584613	0.084	44.1
Capillidium heterosporum	Scaffold2	100	21	0	0	36872	36892	1001503	1001523	0.33	42.1
Capillidium heterosporum	Scaffold2	100	20	0	0	48264	48283	924103	924084	1.3	40.1
Capillidium heterosporum	Scaffold2	100	20	0	0	8356	8375	1352202	1352221	1.3	40.1
Capillidium heterosporum	Scaffold2	95.83	24	1	0	6323	6346	1818292	1818315	1.3	40.1
Capillidium heterosporum	Scaffold2	92.86	28	2	0	5035	5062	1906590	1906617	1.3	40.1
Capillidium heterosporum	Scaffold2	100	20	0	0	7058	7077	3107230	3107211	1.3	40.1
Capillidium heterosporum	Scaffold2	100	19	0	0	43068	43086	183032	183050	5.2	38.2
Capillidium heterosporum	Scaffold2	100	19	0	0	43012	43030	395831	395813	5.2	38.2
Capillidium heterosporum	Scaffold2	95.65	23	1	0	46723	46745	1935615	1935637	5.2	38.2
Capillidium heterosporum	Scaffold2	100	19	0	0	35185	35203	2069556	2069574	5.2	38.2
Capillidium heterosporum	Scaffold2	100	19	0	0	26121	26139	2124431	2124413	5.2	38.2
Capillidium heterosporum	Scaffold21	96	25	1	0	37130	37154	15752	15728	0.33	42.1
Capillidium heterosporum	Scaffold12	100	21	0	0	13010	13030	425199	425179	0.33	42.1
Capillidium heterosporum	Scaffold12	100	21	0	0	13010	13030	501811	501831	0.33	42.1
Capillidium heterosporum	Scaffold12	100	19	0	0	28802	28820	33326	33344	5.2	38.2
Capillidium heterosporum	Scaffold12	95.65	23	1	0	8026	8048	1104052	1104030	5.2	38.2
Capillidium heterosporum	Scaffold5	100	21	0	0	46191	46211	1339380	1339400	0.33	42.1
Capillidium heterosporum	Scaffold5	100	20	0	0	11072	11091	46768	46787	1.3	40.1
Capillidium heterosporum	Scaffold5	100	19	0	0	51307	51325	445518	445500	5.2	38.2
Capillidium heterosporum	Scaffold5	100	19	0	0	14115	14133	880746	880728	5.2	38.2
Capillidium heterosporum	Scaffold5	100	19	0	0	35185	35203	1491332	1491314	5.2	38.2
Capillidium heterosporum	Scaffold29	95.83	24	1	0	34585	34608	4725	4748	1.3	40.1
Capillidium heterosporum	Scaffold25	95.83	24	1	0	2424	2447	12001	12024	1.3	40.1
Capillidium heterosporum	Scaffold25	100	20	0	0	22299	22318	40900	40881	1.3	40.1
Capillidium heterosporum	Scaffold15	95.83	24	1	0	46184	46207	559513	559490	1.3	40.1
Capillidium heterosporum	Scaffold13	95.83	24	1	0	35759	35782	237261	237238	1.3	40.1
Capillidium heterosporum	Scaffold13	95.65	23	1	0	34060	34082	292649	292627	5.2	38.2
Capillidium heterosporum	Scaffold13	100	19	0	0	32586	32604	429008	428990	5.2	38.2
Capillidium heterosporum	Scaffold13	100	19	0	0	30627	30645	1124276	1124294	5.2	38.2
Capillidium heterosporum	Scaffold13	100	19	0	0	24679	24697	1324826	1324844	5.2	38.2
Capillidium heterosporum	Scaffold8	100	20	0	0	31709	31728	1217854	1217873	1.3	40.1
Capillidium heterosporum	Scaffold8	95.65	23	1	0	47315	47337	415517	415495	5.2	38.2
Capillidium heterosporum	Scaffold8	92.59	27	2	0	35703	35729	1400564	1400590	5.2	38.2
Capillidium heterosporum	Scaffold8	100	19	0	0	15439	15457	1434019	1434037	5.2	38.2
Capillidium heterosporum	Scaffold8	100	19	0	0	7845	7863	1581048	1581066	5.2	38.2
Capillidium heterosporum	Scaffold8	95.65	23	1	0	40601	40623	1585583	1585605	5.2	38.2
Capillidium heterosporum	Scaffold8	100	19	0	0	31003	31021	1620104	1620122	5.2	38.2
Capillidium heterosporum	Scaffold7	92.86	28	2	0	6971	6998	1324559	1324532	1.3	40.1
Capillidium heterosporum	Scaffold7	95.83	24	1	0	2424	2447	1489906	1489883	1.3	40.1
Capillidium heterosporum	Scaffold7	100	19	0	0	23595	23613	132307	132325	5.2	38.2
Capillidium heterosporum	Scaffold7	100	19	0	0	5200	5218	1162317	1162335	5.2	38.2
Capillidium heterosporum	Scaffold7	100	19	0	0	21496	21514	1353334	1353316	5.2	38.2
Capillidium heterosporum	Scaffold7	95.65	23	1	0	51302	51324	1496476	1496454	5.2	38.2
Capillidium heterosporum	Scaffold6	95.83	24	1	0	2424	2447	19664	19687	1.3	40.1
Capillidium heterosporum	Scaffold6	100	20	0	0	22299	22318	47900	47881	1.3	40.1
Capillidium heterosporum	Scaffold6	100	20	0	0	17285	17304	162892	162873	1.3	40.1
Capillidium heterosporum	Scaffold6	100	20	0	0	4000	4019	1567235	1567216	1.3	40.1
Capillidium heterosporum	Scaffold6	100	19	0	0	43908	43926	201577	201595	5.2	38.2
Capillidium heterosporum	Scaffold6	95.65	23	1	0	488	510	610662	610684	5.2	38.2
Capillidium heterosporum	Scaffold6	95.65	23	1	0	488	510	639061	639039	5.2	38.2
Capillidium heterosporum	Scaffold6	100	19	0	0	33046	33064	715905	715887	5.2	38.2
Capillidium heterosporum	Scaffold6	100	19	0	0	5873	5891	802783	802801	5.2	38.2
Capillidium heterosporum	Scaffold6	100	19	0	0	44497	44515	1291203	1291185	5.2	38.2
Capillidium heterosporum	Scaffold6	100	19	0	0	16182	16200	1477413	1477395	5.2	38.2
Capillidium heterosporum	Scaffold4	100	20	0	0	20299	20318	989545	989526	1.3	40.1
Capillidium heterosporum	Scaffold4	95.83	24	1	0	14599	14622	1852144	1852167	1.3	40.1
Capillidium heterosporum	Scaffold4	100	19	0	0	40761	40779	184658	184640	5.2	38.2
Capillidium heterosporum	Scaffold4	92.59	27	2	0	43514	43540	189660	189634	5.2	38.2
Capillidium heterosporum	Scaffold4	100	19	0	0	40761	40779	191458	191476	5.2	38.2
Capillidium heterosporum	Scaffold4	100	19	0	0	48017	48035	772861	772879	5.2	38.2
Capillidium heterosporum	Scaffold4	95.65	23	1	0	43647	43669	910079	910057	5.2	38.2
Capillidium heterosporum	Scaffold4	100	19	0	0	32897	32915	942305	942287	5.2	38.2
Capillidium heterosporum	Scaffold4	100	19	0	0	36641	36659	1515941	1515959	5.2	38.2
Capillidium heterosporum	Scaffold4	95.65	23	1	0	37130	37152	2340317	2340295	5.2	38.2
Capillidium heterosporum	Scaffold3	100	20	0	0	43842	43861	669039	669058	1.3	40.1
Capillidium heterosporum	Scaffold3	100	20	0	0	9987	10006	1712182	1712201	1.3	40.1
Capillidium heterosporum	Scaffold3	100	20	0	0	31282	31301	2298126	2298107	1.3	40.1
Capillidium heterosporum	Scaffold3	100	20	0	0	31282	31301	2298149	2298130	1.3	40.1
Capillidium heterosporum	Scaffold3	100	20	0	0	31282	31301	2298172	2298153	1.3	40.1
Capillidium heterosporum	Scaffold3	100	20	0	0	31282	31301	2298195	2298176	1.3	40.1
Capillidium heterosporum	Scaffold3	100	20	0	0	31282	31301	2298218	2298199	1.3	40.1
Capillidium heterosporum	Scaffold3	100	20	0	0	31282	31301	2298241	2298222	1.3	40.1
Capillidium heterosporum	Scaffold3	100	20	0	0	31282	31301	2298263	2298244	1.3	40.1
Capillidium heterosporum	Scaffold3	90.32	31	3	0	45650	45680	554027	554057	5.2	38.2
Capillidium heterosporum	Scaffold3	95.65	23	1	0	18421	18443	987923	987945	5.2	38.2
Capillidium heterosporum	Scaffold3	100	19	0	0	29113	29131	1010531	1010513	5.2	38.2
Capillidium heterosporum	Scaffold3	95.65	23	1	0	32111	32133	1280873	1280895	5.2	38.2
Capillidium heterosporum	Scaffold3	100	19	0	0	2422	2440	1723097	1723079	5.2	38.2
Capillidium heterosporum	Scaffold3	95.65	23	1	0	35950	35972	2105211	2105233	5.2	38.2
Capillidium heterosporum	Scaffold3	95.65	23	1	0	37130	37152	2200234	2200256	5.2	38.2
Capillidium heterosporum	Scaffold3	100	19	0	0	9595	9613	2203478	2203460	5.2	38.2
Capillidium heterosporum	Scaffold3	95.65	23	1	0	37130	37152	2211300	2211322	5.2	38.2
Capillidium heterosporum	Scaffold1	100	20	0	0	9214	9233	1076428	1076409	1.3	40.1
Capillidium heterosporum	Scaffold1	100	20	0	0	44025	44044	1279079	1279098	1.3	40.1
Capillidium heterosporum	Scaffold1	95.83	24	1	0	31291	31314	1776846	1776823	1.3	40.1
Capillidium heterosporum	Scaffold1	100	20	0	0	29550	29569	1888900	1888881	1.3	40.1
Capillidium heterosporum	Scaffold1	95.83	24	1	0	2424	2447	1919275	1919252	1.3	40.1
Capillidium heterosporum	Scaffold1	100	19	0	0	3479	3497	336378	336360	5.2	38.2
Capillidium heterosporum	Scaffold1	100	19	0	0	40940	40958	364261	364279	5.2	38.2
Capillidium heterosporum	Scaffold1	100	19	0	0	25796	25814	521927	521909	5.2	38.2
Capillidium heterosporum	Scaffold1	100	19	0	0	847	865	560275	560293	5.2	38.2
Capillidium heterosporum	Scaffold1	100	19	0	0	41500	41518	708135	708117	5.2	38.2
Capillidium heterosporum	Scaffold1	100	19	0	0	23595	23613	955733	955751	5.2	38.2
Capillidium heterosporum	Scaffold1	100	19	0	0	15078	15096	981397	981379	5.2	38.2
Capillidium heterosporum	Scaffold1	100	19	0	0	28142	28160	1062758	1062740	5.2	38.2
Capillidium heterosporum	Scaffold1	100	19	0	0	44262	44280	1883999	1883981	5.2	38.2
Capillidium heterosporum	Scaffold1	100	19	0	0	5070	5088	2361532	2361514	5.2	38.2
Capillidium heterosporum	Scaffold58	95.65	23	1	0	37130	37152	881	859	5.2	38.2
Capillidium heterosporum	Scaffold45	95.65	23	1	0	46723	46745	10563	10585	5.2	38.2
Capillidium heterosporum	Scaffold35	100	19	0	0	32586	32604	6921	6903	5.2	38.2
Capillidium heterosporum	Scaffold10	95.65	23	1	0	17515	17537	54092	54114	5.2	38.2
Capillidium heterosporum	Scaffold10	100	19	0	0	5185	5203	358271	358289	5.2	38.2
Capillidium heterosporum	Scaffold10	100	19	0	0	30145	30163	540318	540336	5.2	38.2
Capillidium heterosporum	Scaffold10	95.65	23	1	0	18416	18438	1452087	1452109	5.2	38.2
Note: Conidiobolus sp. was lack of available nuclear genome.
